1  
2  
3  
4  
5  
6  
7  
8  
9  
10  
11  
12  
13  
14  
15  
16  
17  
18  
19  
20  
21

**Clonal inactivation of telomerase  
promotes accelerated stem cell differentiation**

Kazuteru Hasegawa<sup>1,2,3</sup>, Yang Zhao<sup>4</sup>, Alina Garbuzov<sup>1,2,3</sup>, M. Ryan Corces<sup>4</sup>, Lu Chen<sup>1,2,3</sup>, PEGGIE  
Cheung<sup>1,2,3</sup>, Yuning Wei<sup>4</sup>, Howard Y. Chang<sup>4,5</sup>, and Steven E. Artandi<sup>1,2,3,\*</sup>

<sup>1</sup>Stanford Cancer Institute, Stanford University School of Medicine, Stanford, CA 94305, USA

<sup>2</sup>Department of Medicine, Stanford University School of Medicine, Stanford, CA 94305, USA

<sup>3</sup>Department of Biochemistry, Stanford University School of Medicine, Stanford, CA 94305, USA

<sup>4</sup>Center for Personal Dynamic Regulomes, Stanford, CA 94305, USA

<sup>5</sup>Howard Hughes Medical Institute, Stanford University, Stanford, CA 94305, USA

\* Corresponding author: Steven E. Artandi. Correspondence and requests for materials should be addressed to S.E.A. ([sartandi@stanford.edu](mailto:sartandi@stanford.edu))

## 1 **Summary**

2 Telomerase is intimately associated with stem cells and upregulated in cancer, where it serves essential  
3 roles through its catalytic action in elongating telomeres, nucleoprotein caps that protect chromosome  
4 ends<sup>1</sup>. Overexpression of the telomerase reverse transcriptase (TERT) enhances cell proliferation  
5 through telomere-independent means, yet definitive evidence for such a direct role in stem cell function  
6 has yet to be revealed through loss-of-function studies. Here, we show that conditional deletion of TERT  
7 in spermatogonial stem cells (SSCs) markedly impairs competitive clone formation. Using  
8 lineage-tracing from the *Tert* locus, we find that TERT-expressing SSCs yield long-lived clones, but that  
9 selective TERT-inactivation in SSCs causes accelerated stem cell differentiation thereby disrupting  
10 clone formation. This requirement for TERT in clone formation is bypassed by expression of a  
11 catalytically inactive TERT transgene and occurs independently of the canonical telomerase complex.  
12 TERT inactivation induces a genome-wide reduction in open chromatin evident in purified SSCs, but not  
13 in committed progenitor cells. Loss of TERT causes reduced activity of the MYC oncogene and  
14 transgenic expression of MYC in TERT-deleted SSCs efficiently rescues clone formation. These data  
15 reveal a required catalytic activity-independent role for TERT in preventing stem cell differentiation, forge  
16 a genetic link between TERT and MYC and suggest new means by which TERT may promote  
17 tumorigenesis.

## 1 Main Text

2 Telomerase is enriched in tissue stem cells and activated by somatic promoter mutations in many  
3 cancers<sup>2-4</sup>. The core of the telomerase enzyme is comprised of the catalytic subunit TERT and the  
4 telomerase RNA component (*Terc*), a small non-coding RNA scaffold that encodes the template for  
5 telomere addition<sup>1</sup>. The critical requirement for telomerase in long-term cell viability is conserved from  
6 single cell eukaryotes to humans. Cell proliferation in the absence of telomerase results in a lag phase  
7 that is initially well tolerated while telomere reserves are ample. But, proliferation for extended periods in  
8 the absence of telomerase culminates in senescence or cell death as telomeres progressively shorten  
9 and eventually become dysfunctional. This is particularly evident in laboratory mice, which have very  
10 long telomeres (40-80 kb vs 5-15 kb in humans). Telomerase knockout mice are initially viable, but  
11 subsequent intergenerational breeding results in severe tissue defects in the advanced generations<sup>5-7</sup>.  
12 These findings established the paradigm that TERT is required only for its role in synthesizing telomeres.  
13 In contrast with these loss-of-function studies, overexpression studies have suggested that TERT  
14 promotes cell proliferation independent of its enzyme function. Conditional transgenic TERT expression  
15 caused proliferation of hair follicle stem cells<sup>8</sup>, skin basal layer keratinocytes<sup>9</sup> and kidney podocytes<sup>10</sup>.  
16 These effects of TERT were separable from telomere synthesis because they also occurred with a  
17 catalytically inactive TERT allele, or in mice lacking *Terc*<sup>8-10</sup>. In this context, TERT has been shown to  
18 activate MYC, WNT and NFkB pathways<sup>8-14</sup>. However, the role of non-canonical functions of TERT in  
19 tissue stem cells remains unclear due to the lack of definitive and immediate phenotype in TERT  
20 knockout mice.

21  
22 Tissue homeostasis and carcinogenesis are shaped by cell competition, a mechanism to optimize cell  
23 composition in tissues by promoting replacement of damaged or unfit cells with more robust neighboring  
24 cells<sup>15</sup>. In renewing mammalian tissues including intestine, skin, and testis, competitive repopulation is a  
25 fundamental property of adult stem cells<sup>16</sup>. Stem cell competition results in a dominant expansion of

1 more fit “winner clones” and an elimination of less fit “loser clones” at the niche<sup>17</sup>. This competitive  
2 behavior is also characteristic of carcinogenesis during which oncogenic mutations drive cells to clonally  
3 expand their territory through a process of super-competition<sup>18</sup>. Among tissues where competitive  
4 repopulation has been observed, testis shows high telomerase activity and exhibits unusual telomere  
5 dynamics in that telomere lengths are preserved with aging, in contrast to the progressive shortening  
6 seen in other human tissues. We previously found that spermatogonial stem cells (SSCs) express high  
7 levels of TERT and TERT is downregulated with lineage commitment<sup>7</sup>. To understand the  
8 telomere-independent role of TERT in stem cells, we developed a system to mark single SSCs  
9 expressing TERT coupled with the ability to conditionally inactivate TERT using a lineage tracing  
10 approach. Combining with transgenic rescue experiments and genomic assays, these studies establish  
11 TERT as a mediator of stem cell competition in the testis, where it supports stem cell function through a  
12 non-canonical mechanism independent of telomere synthesis.  
13



## 1 Results

### 2 High TERT expression marks long-term SSCs that undergo stem cell competition

3 Spermatogenesis is a dynamic process to produce sperm, composed of mitosis, meiosis and  
4 post-meiotic maturation (Extended Data Fig. 1a,b). In the testis, SSCs reside within a functionally and  
5 morphologically heterogeneous population undifferentiated spermatogonia (US). Singly isolated  $A_{\text{single}}$   
6 ( $A_s$ ) US undergo incomplete cytokinesis, subsequently producing progressively elongating chains of  
7 interconnected cells ( $A_{\text{pr}} - A_{16}$ ) (Extended Data Fig. 1b)<sup>19</sup>. Maturation of US yields differentiating  
8 spermatogonia (DS), which is accompanied by loss of stem cell potential. To measure *Tert* expression in  
9 distinct spermatogonia subpopulations, we purified  $\text{MCAM}^{\text{high}} \text{KIT}^- \text{US}$  (US-h),  $\text{MCAM}^{\text{med}} \text{KIT}^- \text{US}$  (US-m)  
10 and  $\text{MCAM}^{\text{med}} \text{KIT}^+ \text{DS}$  (Extended Data Fig. 1a-c). Among these subpopulations, *Tert* mRNA expression  
11 was high in both US-h and US-m cells, and sharply decreased in DS cells (Extended Data Fig. 1d).  
12 *Tert-Tdtomato* reporter mice also showed high Tdtomato expression both in US-h and US-m (Extended  
13 Data Fig. 1e). These data indicate that the entire US population exhibits high *Tert* expression.

14  
15 To functionally study TERT-expressing spermatogonia, we developed a lineage tracing assay using  
16 *Tert*<sup>CreER/+</sup>; *Rosa26*<sup>Isl-Tdtomato/+</sup> (*Tert*<sup>CreER/+</sup>) mice, in which TERT-expressing cells are permanently labeled  
17 upon tamoxifen-dependent activation of CreER to express Tdtomato (Fig. 1a,b)<sup>20</sup>. Marking SSCs results  
18 in long-lived Tdtomato<sup>+</sup> clones, also known as patches, comprised of many daughter cells produced by  
19 the labeled SSC<sup>21</sup>. If committed progenitor cells are labeled, only a small transient clone is generated  
20 and these cells are lost through differentiation (Fig. 1a,b). Sparse labeling allows rare SSCs to be  
21 marked, and in this context each patch derives from a single SSC. Thus, measuring the number of  
22 Tdtomato<sup>+</sup> patches allows a quantitative assessment of stem cell self-renewal activity.

23  
24 At two days after tamoxifen injection, TdTomato was detected similarly throughout the population of US  
25 but not in KIT<sup>+</sup> cells (Extended Data Fig. 2a-c). At three months, marking TERT<sup>+</sup> cells yielded labeled  
26 patches (Fig. 1c and Extended Data Fig. 2e). As we varied the dose of administered tamoxifen from 0.25

1 mg to 4 mg, patch number increased in a dose-dependent manner (Fig. 1d, and Extended Data Fig. 2d).  
2 Patch length remained constant below 1mg but increased above 2mg, reflecting the fusion of two  
3 independently labeled clones with high dose (Fig. 1e). In mice treated with 1mg tamoxifen and traced for  
4 one year, patch length increased, clone number decreased, and the total aggregated Tdtomato<sup>+</sup> patch  
5 length (mean patch number times mean patch length) remained constant compared with those traced  
6 for three months, consistent with previously described stochastic competition with unlabeled clones (Fig.  
7 1d-f, and Extended Data Fig. 2d)<sup>21</sup>. At both three months and one year, patches were comprised of cells  
8 throughout the spermatogenic lineage (Extended Data Fig. 2f). Altogether, these data show that  
9 TERT-expressing SSCs generate long-lived clones and exhibit competition within the stem cell pool.

10

### 11 **TERT deletion impairs SSC-mediated clone formation**

12 To investigate a direct and immediate role for TERT in stem cells, we developed a competitive clone  
13 formation assay using *Tert*<sup>CreER/flox</sup>;*Rosa*<sup>Isl-Tdtomato/+</sup> (*Tert*<sup>CreER/flox</sup>) mice (Fig. 1g, and Extended Data Fig.  
14 3a-c). In this strain, activation of CreER induces Tdtomato labeling and concomitantly inactivates *Tert* in  
15 the same TERT<sup>+</sup> cell, enabling one to trace the fate of cell clones deriving from SSCs in which *Tert* has  
16 been somatically deleted in an environment where most neighboring cells retain TERT expression. At  
17 two days after 1mg tamoxifen treatment, GFRA1<sup>+</sup> A<sub>s</sub> and A<sub>pr</sub> clones were marked indistinguishably in  
18 both *Tert*<sup>CreER/+</sup> and *Tert*<sup>CreER/flox</sup> mice (Fig. 1h,i). Pulse labeling efficiently eliminated *Tert* mRNA in  
19 Tdtomato<sup>+</sup> US (Fig. 1j,k). At three months and six months, deletion of TERT caused a marked reduction  
20 in the number of Tdtomato<sup>+</sup> clones and diminished mean patch length (Fig. 1l-n). Correspondingly, the  
21 total aggregated Tdtomato<sup>+</sup> patch length was sharply reduced (Fig. 1o). Together, these findings  
22 indicate that TERT-deletion compromises long-term clone formation ability of SSCs under these  
23 competitive conditions.

24

### 25 **TERT promotes SSC competition independent of its catalytic activity and the telomerase** 26 **complex**

1 To determine whether the effect of TERT in enhancing SSC competition depends on its catalytic activity,  
2 we developed a system to rescue the defect in TERT-deleted cells using tetracycline-regulated TERT  
3 transgenes: either one that is wild-type (TetO-TERT) or one that is catalytically inactive (TetO-TERTci)  
4 due to a single amino acid substitution in the catalytic site<sup>9</sup>. We produced compound mouse strains in  
5 which activation of CreER simultaneously deletes the floxed *Tert* gene while inducing expression of  
6 transgenic *Tert* by triggering expression of the tetracycline transactivator (tTA) that binds and activates  
7 the *TetO* promoters (Fig. 2a). We analyzed how TERT loss affected clone formation in  
8  $Tert^{CreER/flox}; Rosa^{Isl-Tdtomato/Isl-tTA}$  ( $Tert^{CreER/flox}$ ) vs.  $Tert^{CreER/+}; Rosa^{Isl-Tdtomato/Isl-tTA}$  ( $Tert^{CreER/+}$ ) controls and we  
9 compared these results with restoration of *Tert* expression in  $Tert^{CreER/flox}; Rosa^{Isl-Tdtomato/Isl-tTA}; TetO-Tert$   
10 ( $Tert^{CreER/flox} + Tert$ ) mice or  $Tert^{CreER/flox}; Rosa^{Isl-Tdtomato/Isl-tTA}; TetO-Tertci$  ( $Tert^{CreER/flox} + Tertci$ ) mice (Fig. 2a).  
11 Transgenic *Tert* and *Tertci* expression was induced at a physiological range by treating mice with low  
12 dose doxycycline, which suppresses binding of tTA to the TetO promoter (Extended Data Fig. 4a).  
13 Transgenic expression of wild-type *Tert*, but not *Tertci*, restored telomerase activity (Extended Data Fig.  
14 4b). Intriguingly, expression of either *Tert* or *Tertci* transgenes fully rescued patch number, average  
15 patch length, and total patch length (Fig. 2b-e). Furthermore, expression of TERTci significantly  
16 increased total patch length compared to control  $Tert^{CreER/+}$  mice (Fig. 2e). These results indicate that  
17 TERT promotes enhanced stem cell competition independent of its catalytic activity.  
18  
19 *Terc* encodes the RNA template for telomere addition and serves as the central scaffold for assembly of  
20 the telomerase complex. Therefore in the absence of *Terc*, TERT and the other components of  
21 telomerase fail to associate<sup>1,22</sup>. To determine whether formation of the telomerase complex is required  
22 for the TERT-dependent SSC clone formation, we produced first generation  
23  $Terc^{-/-}; Tert^{CreER/flox}; Rosa^{Isl-Tdtomato/+}$  (G1  $Terc^{-/-}; Tert^{CreER/flox}$ ) mice (Extended Data Fig. 4c. In this strain,  
24 telomerase was inactive in testes (Extended Data Fig. 4d). Three months after tamoxifen treatment,  
25 conditional deletion of *Tert* in *Terc*-deficient mice impaired patch number, patch length, and total patch

1 length (Extended Data Fig. 4e-h). These findings uncouple the requirement for TERT in stem cell  
2 competition from engagement in the classical telomerase complex.  
3  
4 Somatic deletion of *Tert* in mice with very long telomeres is unlikely to cause telomere dysfunction<sup>7,23,24</sup>.  
5 When telomeres become short, however, a DNA damage response activates the p53 tumor suppressor  
6 protein, triggering either cell death or senescence<sup>25</sup>. To understand whether the impaired clone  
7 formation in TERT-deleted SSCs is mediated by p53, we generated  
8 *Trp53<sup>flox/flox</sup>;Tert<sup>CreER/flox</sup>;Rosa<sup>Isl-Tdtomato/+</sup>* mice and examined competitive clone formation (Extended Data  
9 Fig. 5a). At day five, the deletion efficiency of the *Trp53-flox* alleles in Tdtomato<sup>+</sup> US was 44.4%  
10 (Extended Data Fig. 5b,c). We found that deletion of p53 failed to rescue the impaired clone formation  
11 associated with *Tert* inactivation, as measured by patch number, patch length, and total patch length  
12 (Extended Data Fig. 5d-g). Consistent with these findings, we found no accumulation of  $\gamma$ H2AX, a  
13 marker of DNA damage, in *Tert<sup>CreER/flox</sup>* mice, whereas  $\gamma$ H2AX was elevated in G6 *Tert<sup>Tdtomato/Tdtomato</sup>* mice  
14 with dysfunctional telomeres (Extended Data Fig. 5h,i). Taken together, the effects of TERT in promoting  
15 stem cell-derived clone formation is independent of catalytic activity, the DNA damage response and the  
16 canonical telomerase complex.

17

## 18 **Accelerated differentiation and impaired proliferation of SSCs lacking TERT**

19 The preferential elimination of conditionally TERT-deleted SSCs could be caused by accelerated  
20 differentiation, impaired proliferation, or increased apoptosis. To distinguish among these possibilities,  
21 we investigated how clonal deletion of TERT influences SSC fate across at time points. At 14 days after  
22 tamoxifen administration, Tdtomato<sup>+</sup> A<sub>s</sub> and A<sub>pr</sub> US were significantly decreased in *Tert<sup>CreER/flox</sup>* mice, and  
23 the reduction of those cells was rescued by transgenic expression of either TERT or TERTci (Fig. 2f and  
24 Extended Data Fig. 6a). At six weeks when a comparable frequency of labeled patches were found in  
25 *Tert<sup>CreER/+</sup>* and *Tert<sup>CreER/flox</sup>* mice, labeled clones harbored significantly fewer US (Fig. 2g,h Extended Data  
26 Fig. 6b,c). These results indicate that TERT deletion promotes differentiation of US. To understand how

1 TERT loss affects cell proliferation, we measured BrdU incorporation seven days after tamoxifen  
2 administration. The percentage of US incorporating BrdU was significantly reduced in *Tert*<sup>CreER/flox</sup>  
3 animals and proliferation was rescued with transgenic expression of *Tert* or *Tertci* (Fig. 2i and Extended  
4 Data Fig. 6d). There was no increase in apoptosis by cleaved-PARP staining in *Tert*<sup>CreER/flox</sup> mice, but  
5 apoptosis was elevated in testes from G6 *Tert*<sup>Tdtomato/Tdtomato</sup> mice with critically short telomeres (Extended  
6 Data Fig. 6e,f). Taken together, impaired clone formation of TERT deleted SSCs is caused by  
7 accelerated differentiation and decreased proliferation.

8

### 9 **TERT deletion compromises chromatin accessibility in SSCs but not in committed progenitors**

10 To understand how TERT deletion affects global chromatin structure, we performed ATAC-seq, which  
11 allows an assessment of chromatin accessibility genome-wide<sup>26</sup>. To first define the patterns of  
12 chromatin changes during normal spermatogenesis, we purified US-h, US-m, and DS from *Tert*<sup>CreER/+</sup>  
13 mice that had been injected with tamoxifen seven days prior to isolation, while spermatocytes (SP) and  
14 round spermatids (RS) were purified based on differential *Tert* promoter activity in *Tert*<sup>Tdtomato/+</sup> mice<sup>7</sup>.  
15 Principal component analysis (PCA) revealed that US-h and US-m clustered together in the lower left  
16 quadrant, consistent with their similar gene expression patterns (Extended Data Fig. 7a)<sup>27</sup>. DS cells  
17 localized in the upper left quadrant, while SP and RS populations were clustered together in the right  
18 lower quadrant (Extended Data Fig. 7a), indicating that the PC1 axis captures the changes in global  
19 chromatin state associated with differentiation. Similarly, Pearson correlation hierarchical clustering  
20 showed a high correlation in open chromatin patterns among spermatogonia subpopulations, but abrupt  
21 changes of chromatin accessibility globally upon entry to meiosis (Extended Data Fig. 7b). The number  
22 of unique ATAC-seq peaks and promoter chromatin accessibility around transcription start sites were  
23 highest in US-h and US-m and decreased significantly during differentiation into DS and SP (Fig. 3a,b,  
24 and Extended Data Fig. 7c,d). The promoter region of *Tert* was accessible in US-h, US-m and DS, but  
25 inaccessible in SP and RS, consistent with the expression pattern of TERT during spermatogenesis

1 (Extended Data Fig. 8a) <sup>7</sup>. Altogether, these data reveal that SSCs show a marked increase in chromatin  
2 accessibility, indicating that a global reduction in chromatin accessibility occurs during spermatogenesis.  
3  
4 To understand how conditional TERT-deletion influences chromatin accessibility in SSC populations, we  
5 performed ATAC-seq on US-h, US-m and DS isolated from *Tert*<sup>CreER/flox</sup> mice. Pearson correlation  
6 hierarchical clustering showed that the overall pattern of chromatin accessibility in TERT-deleted cells  
7 remained similar to that of *Tert*<sup>CreER/+</sup> controls (Extended Data Fig. 7b). However, PCA revealed that  
8 TERT deletion caused a shift in the US-h and US-m along the differentiation axis, whereas TERT loss  
9 had no discernible effect on committed DS (Fig. 3c). Deletion of TERT in the US populations caused a  
10 marked reduction in the number of open chromatin peaks and diminished chromatin accessibility  
11 surrounding TSSs to a level resembling the control DS (Fig. 3a,b,d,e and Extended Data Fig. 7e). In  
12 contrast, peak number was unaffected by TERT deletion in DS (Fig. 3 a,b,d,e and Extended Data Fig.  
13 7e). This reduction in open chromatin peaks was evident in genes associated with stemness in SSCs,  
14 including *Ret*, *Gfra1*, *Cdh1*, and *Zbtb16*, whereas those associated with differentiation including *Kit*,  
15 *Prm2*, and *Prm3* remained unchanged (Extended Data Fig. 8b-d). Pathway analysis revealed that genes  
16 in the MAPK signaling pathway, which promotes self-renewal of SSCs <sup>28</sup>, were particularly enriched  
17 among those showing loss of open chromatin peaks in the TERT-deleted undifferentiated  
18 spermatogonia (Extended Data Fig. 7f). Taken together, conditional inactivation of TERT caused a loss  
19 of open chromatin selectively in the stem cell containing population but not in committed progenitors,  
20 consistent with accelerated stem cell differentiation caused by TERT deletion.

## 21 22 **TERT promotes competitive clone formation of SSCs through MYC**

23 To understand how TERT promotes competitive clone formation in SSCs, we examined gene  
24 expression in TERT-deleted US-h cells by RNA-seq seven days after tamoxifen administration. PCA  
25 showed that TERT-deleted US-h clustered separately from TERT<sup>+</sup> controls (Fig. 4a). Using strict cutoffs  
26 for significance, there were 23 genes downregulated and 116 genes upregulated in TERT-deleted US-h

1 (Extended Data Fig. 9a). Gene set enrichment analysis revealed that spermatogenesis-related genes  
2 were upregulated in TERT-deleted US-h, consistent with their accelerated differentiation (Extended Data  
3 Fig. 9b). Several gene sets were downregulated in TERT-deleted US-h cells, including E2F targets and  
4 G2M checkpoints, reflecting the quantitative reduction in proliferation in these cells (Extended Data Fig.  
5 9c). The most significantly downregulated gene set was 'MYC targets v1' and a second gene set 'MYC  
6 targets v2' was also represented (Fig. 3b, and Extended Data Fig. 9c). Consistent with this, MYC protein  
7 was significantly decreased in TERT-deleted US and MYC levels were restored by transgenic  
8 expression of TERT or TERTci (Fig.4c, and Extended Data Fig.9d,e). *Myc* mRNA levels remained  
9 unchanged, suggesting that TERT promotes MYC expression at the post-transcriptional level (Extended  
10 Data Fig. 9f).

11  
12 MYC is a transcription factor that promotes cell competitiveness by regulating cell proliferation, growth,  
13 and metabolism<sup>29-32</sup>. MYC has been shown to promote SSC self-renewal and also an important  
14 oncogene<sup>33-35</sup>. Given the genetic links between TERT and MYC, we hypothesized that MYC  
15 overexpression might rescue the failure of clone formation in TERT-deleted SSCs. To test this idea, we  
16 intercrossed *Tert*<sup>CreER/flox</sup>; *Rosa*<sup>Isl-Tdtomato/Isl-tTA</sup> mice with *TetO-human MYC* transgenic mice (*Tert*<sup>CreER/flox</sup>  
17 +*MYC*) (Fig. 4d). This system allows simultaneous deletion of the residual TERT allele and activation of  
18 transgenic MYC selectively in a lineage of TERT-expressing stem cells. To limit expression levels of  
19 transgenic MYC, mice were treated with doxycycline, which reduced transgenic *MYC* mRNA levels by  
20 5.6 fold (Extended Data Fig. 9g). Three months after tamoxifen treatment, the defects in clone formation  
21 associated with TERT loss were dramatically rescued by MYC expression, as measured by patch  
22 number, patch length and total patch length (Fig. 4e-h). MYC expression also restored the number of  
23 GFRA1<sup>+</sup> cells, proliferation and expression of MYC target genes (Fig. 4i,j and Extended Data Fig. 9h).  
24 Taken together, these results indicate that the marked defect in stem cell competition associated with  
25 TERT loss is due to impaired MYC function and establish an epistatic relationship between TERT and  
26 MYC.

1

## 2 **Discussion**

3 TERT is expressed in many stem cell compartments governed by competitive repopulations and TERT  
4 upregulation is selected for during human carcinogenesis. By tracing the fate of individual SSCs *in vivo*,  
5 we found that loss of TERT severely compromises competitive clone formation and accelerates stem  
6 cell differentiation. In this context, TERT-deleted stem cells represent “loser” clones outcompeted by  
7 TERT-proficient “winner” clones. This requirement for TERT in competitive clone formation is  
8 independent of telomeres and TERT catalytic function; instead, TERT maintains chromatin accessibility  
9 across many genes expressed in stem cells. These findings establish TERT as a key determinant  
10 regulating competition between tissue stem cells by favoring self-renewal and disfavoring differentiation  
11 (Extended Data Fig. 10). This result is surprising in that germline inactivation of TERT in mice is well  
12 tolerated initially, although SSC function is ultimately compromised by telomere dysfunction after many  
13 generations of telomerase-deficiency. Competitive behavior of SSCs may explain why germline  
14 mutations in *Tert* do not cause an obvious phenotype in laboratory mice. Selection of winner clones and  
15 elimination of loser clones in the testis may be determined in part based on competition for limiting niche  
16 signals<sup>36</sup>. This niche-dependent competition between TERT-proficient and TERT-deficient cells may  
17 amplify cell-autonomous defects caused by acute TERT deletion, while promoting elimination of  
18 TERT-deleted SSCs. Homogeneous deletion of TERT throughout the organism does not create a  
19 TERT-dependent competition, and in this context TERT-deficient cells are capable of self-renewal and  
20 differentiation to produce sperm. Thus, germline gene inactivation identifies only one layer of activity,  
21 whereas clonal, conditional gene deletion can reveal deeper aspects of gene function.

22

23 While TERT levels are important in maintaining stem cell function, they may play a similar role during  
24 carcinogenesis. TERT is upregulated in many human tumors through non-coding mutations in the  
25 proximal TERT promoter. These TERT promoter mutations show strong positive selection during tumor  
26 progression, as the prevalence of these mutations increases substantially from pre-invasive to invasive



1 stages. Our data establishing an epistatic relationship between TERT and MYC provide support for this  
2 model. MYC activity is central in determining outcomes in cell competition; cells expressing higher MYC  
3 outcompete those with lower MYC and MYC represents a key node in many human cancers<sup>29-32</sup>. TERT  
4 upregulation in cancer likely increases telomerase activity and stabilizes telomeres, thereby preventing  
5 the negative effects of dysfunctional telomeres on cell cycle and cell survival. At the same time, TERT  
6 upregulation may enhance cell competition through MYC and its non-canonical effects in promoting  
7 self-renewal and preventing differentiation. MYC can also control TERT levels by directly activating  
8 transcription of *Tert* through promoter binding<sup>37-39</sup>. Therefore TERT and MYC may comprise a positive  
9 feedback loop that promotes cell competition in various tissues during development, homeostasis and  
10 carcinogenesis. Our findings using clonal deletion in SSCs add important new complexity to our  
11 understanding of TERT function. Taken together, this study establish a role for TERT in promoting clonal  
12 competition in stem cells *in vivo* with important implications for understanding tissue homeostasis, cancer  
13 development and telomere maintenance.  
14

1 **Main references**

- 2 1 Roake, C. M. & Artandi, S. E. Regulation of human telomerase in homeostasis and disease. *Nat*  
3 *Rev Mol Cell Biol*, doi:10.1038/s41580-020-0234-z (2020).
- 4 2 Huang, F. W. *et al.* Highly recurrent TERT promoter mutations in human melanoma. *Science* **339**,  
5 957-959, doi:10.1126/science.1229259 (2013).
- 6 3 Horn, S. *et al.* TERT promoter mutations in familial and sporadic melanoma. *Science* **339**,  
7 959-961, doi:10.1126/science.1230062 (2013).
- 8 4 Killela, P. J. *et al.* TERT promoter mutations occur frequently in gliomas and a subset of tumors  
9 derived from cells with low rates of self-renewal. *Proc Natl Acad Sci U S A* **110**, 6021-6026,  
10 doi:10.1073/pnas.1303607110 (2013).
- 11 5 Wong, K. K. *et al.* Telomere dysfunction impairs DNA repair and enhances sensitivity to ionizing  
12 radiation. *Nat Genet* **26**, 85-88, doi:10.1038/79232 (2000).
- 13 6 Lee, H. W. *et al.* Essential role of mouse telomerase in highly proliferative organs. *Nature* **392**,  
14 569-574, doi:10.1038/33345 (1998).
- 15 7 Pech, M. F. *et al.* High telomerase is a hallmark of undifferentiated spermatogonia and is  
16 required for maintenance of male germline stem cells. *Genes Dev* **29**, 2420-2434,  
17 doi:10.1101/gad.271783.115 (2015).
- 18 8 Sarin, K. Y. *et al.* Conditional telomerase induction causes proliferation of hair follicle stem cells.  
19 *Nature* **436**, 1048-1052 (2005).

- 1 9 Choi, J. *et al.* TERT promotes epithelial proliferation through transcriptional control of a Myc- and  
2 Wnt-related developmental program. *PLoS Genet* **4**, e10 (2008).
- 3 10 Shkreli, M. *et al.* Reversible cell-cycle entry in adult kidney podocytes through regulated control  
4 of telomerase and Wnt signaling. *Nature medicine*, doi:10.1038/nm.2550 (2011).
- 5 11 Park, J.-I. *et al.* Telomerase modulates Wnt signalling by association with target gene chromatin.  
6 *Nature* **460**, 66-72, doi:10.1038/nature08137 (2009).
- 7 12 Koh, C. M. *et al.* Telomerase regulates MYC-driven oncogenesis independent of its reverse  
8 transcriptase activity. *J Clin Invest* **125**, 2109-2122, doi:10.1172/JCI79134 (2015).
- 9 13 Khattar, E. *et al.* Telomerase reverse transcriptase promotes cancer cell proliferation by  
10 augmenting tRNA expression. *J Clin Invest* **126**, 4045-4060, doi:10.1172/JCI86042 (2016).
- 11 14 Ghosh, A. *et al.* Telomerase directly regulates NF-kappaB-dependent transcription. *Nat Cell Biol*  
12 **14**, 1270-1281, doi:10.1038/ncb2621 (2012).
- 13 15 Baker, N. E. Emerging mechanisms of cell competition. *Nat Rev Genet*,  
14 doi:10.1038/s41576-020-0262-8 (2020).
- 15 16 Krieger, T. & Simons, B. D. Dynamic stem cell heterogeneity. *Development* **142**, 1396-1406,  
16 doi:10.1242/dev.101063 (2015).
- 17 17 Snippert, H. J. *et al.* Intestinal crypt homeostasis results from neutral competition between  
18 symmetrically dividing Lgr5 stem cells. *Cell* **143**, 134-144, doi:10.1016/j.cell.2010.09.016 (2010).
- 19 18 Vishwakarma, M. & Piddini, E. Outcompeting cancer. *Nat Rev Cancer*,  
20 doi:10.1038/s41568-019-0231-8 (2020).

- 1 19 de Rooij, D. G. The nature and dynamics of spermatogonial stem cells. *Development* **144**,  
2 3022-3030, doi:10.1242/dev.146571 (2017).
- 3 20 Lin, S. *et al.* Distributed hepatocytes expressing telomerase repopulate the liver in homeostasis  
4 and injury. *Nature* **556**, 244-248, doi:10.1038/s41586-018-0004-7 (2018).
- 5 21 Klein, A. M., Nakagawa, T., Ichikawa, R., Yoshida, S. & Simons, B. D. Mouse germ line stem  
6 cells undergo rapid and stochastic turnover. *Cell Stem Cell* **7**, 214-224,  
7 doi:10.1016/j.stem.2010.05.017 (2010).
- 8 22 Venteicher, A. S. *et al.* A human telomerase holoenzyme protein required for Cajal body  
9 localization and telomere synthesis. *Science* **323**, 644-648, doi:10.1126/science.1165357  
10 (2009).
- 11 23 Yuan, X. *et al.* Presence of telomeric G-strand tails in the telomerase catalytic subunit TERT  
12 knockout mice. *Genes Cells* **4**, 563-572, doi:10.1046/j.1365-2443.1999.00284.x (1999).
- 13 24 Liu, Y. *et al.* The telomerase reverse transcriptase is limiting and necessary for telomerase  
14 function in vivo. *Curr Biol* **10**, 1459-1462, doi:10.1016/s0960-9822(00)00805-8 (2000).
- 15 25 Chin, L. *et al.* p53 deficiency rescues the adverse effects of telomere loss and cooperates with  
16 telomere dysfunction to accelerate carcinogenesis. *Cell* **97**, 527-538 (1999).
- 17 26 Buenrostro, J. D., Giresi, P. G., Zaba, L. C., Chang, H. Y. & Greenleaf, W. J. Transposition of  
18 native chromatin for fast and sensitive epigenomic profiling of open chromatin, DNA-binding  
19 proteins and nucleosome position. *Nat Methods* **10**, 1213-1218, doi:10.1038/nmeth.2688 (2013).

- 1 27 Garbuzov, A. *et al.* Purification of GFRalpha1+ and GFRalpha1- Spermatogonial Stem Cells  
2 Reveals a Niche-Dependent Mechanism for Fate Determination. *Stem cell reports* **10**, 553-567,  
3 doi:10.1016/j.stemcr.2017.12.009 (2018).
- 4 28 Hasegawa, K., Namekawa, S. H. & Saga, Y. MEK/ERK signaling directly and indirectly  
5 contributes to the cyclical self-renewal of spermatogonial stem cells. *Stem Cells* **31**, 2517-2527,  
6 doi:10.1002/stem.1486 (2013).
- 7 29 Ellis, S. J. *et al.* Distinct modes of cell competition shape mammalian tissue morphogenesis.  
8 *Nature* **569**, 497-502, doi:10.1038/s41586-019-1199-y (2019).
- 9 30 Diaz-Diaz, C. *et al.* Pluripotency Surveillance by Myc-Driven Competitive Elimination of  
10 Differentiating Cells. *Dev Cell* **42**, 585-599 e584, doi:10.1016/j.devcel.2017.08.011 (2017).
- 11 31 Johnston, L. A. Socializing with MYC: cell competition in development and as a model for  
12 premalignant cancer. *Cold Spring Harb Perspect Med* **4**, a014274,  
13 doi:10.1101/cshperspect.a014274 (2014).
- 14 32 Claveria, C., Giovinazzo, G., Sierra, R. & Torres, M. Myc-driven endogenous cell competition in  
15 the early mammalian embryo. *Nature* **500**, 39-44, doi:10.1038/nature12389 (2013).
- 16 33 Kanatsu-Shinohara, M. *et al.* Myc/Mycn-mediated glycolysis enhances mouse spermatogonial  
17 stem cell self-renewal. *Genes Dev* **30**, 2637-2648, doi:10.1101/gad.287045.116 (2016).
- 18 34 Gabay, M., Li, Y. & Felsher, D. W. MYC activation is a hallmark of cancer initiation and  
19 maintenance. *Cold Spring Harb Perspect Med* **4**, doi:10.1101/cshperspect.a014241 (2014).

- 1 35 Kanatsu-Shinohara, M., Onoyama, I., Nakayama, K. I. & Shinohara, T. Skp1-Cullin-F-box  
2 (SCF)-type ubiquitin ligase FBXW7 negatively regulates spermatogonial stem cell self-renewal.  
3 *Proc Natl Acad Sci U S A* **111**, 8826-8831, doi:10.1073/pnas.1401837111 (2014).
- 4 36 Kitadate, Y. *et al.* Competition for Mitogens Regulates Spermatogenic Stem Cell Homeostasis in  
5 an Open Niche. *Cell Stem Cell* **24**, 79-92 e76, doi:10.1016/j.stem.2018.11.013 (2019).
- 6 37 Greenberg, R. A. *et al.* Telomerase reverse transcriptase gene is a direct target of c-Myc but is  
7 not functionally equivalent in cellular transformation. *Oncogene* **18**, 1219-1226,  
8 doi:10.1038/sj.onc.1202669 (1999).
- 9 38 Wu, K. J. *et al.* Direct activation of TERT transcription by c-MYC. *Nat Genet* **21**, 220-224,  
10 doi:10.1038/6010 (1999).
- 11 39 Wang, J., Xie, L. Y., Allan, S., Beach, D. & Hannon, G. J. Myc activates telomerase. *Genes Dev*  
12 **12**, 1769-1774, doi:10.1101/gad.12.12.1769 (1998).
- 13

## 1 **Methods**

2 **Animals.** All animal protocols were approved by the Institutional Animal Care and Use Committee at  
3 Stanford University. All experiments are in compliance with the ethical regulations of Stanford University.  
4 *Tert-CreER*, *TetO-Tert*, *TetO-Tertci*, *Tert-Tdtomato* mice were previously reported <sup>7,10,20</sup>.  
5 *Rosa-IsITdtomato*<sup>40</sup>, *Rosa-IsI-tTA*<sup>41</sup>, *TetO-hMYC*<sup>42</sup>, *Terc-KO*<sup>43</sup>, *Trp53-flox*<sup>44</sup> mice were purchased from  
6 The Jackson laboratory. Tamoxifen (Cayman) was dissolved in corn oil (Sigma-Aldrich) at 5 - 20mg/ml  
7 by incubating at 50°C for 30min with mixing every 5min. Two- to three-month-old mice were  
8 administrated with 0.25 - 4mg per 25g body weight tamoxifen by oral gavage or intra-peritoneal injection.  
9 Doxycycline (Sigma-Aldrich) was dissolved in drinking water in light-protected bottles at 1 or 3 µg/ml and  
10 changed every 4 days. BrdU (Sigma-Aldrich) was dissolved in PBS at 10mg/ml and intra-peritoneally  
11 injected at 1.25mg per 25g body weight at 2 hours before sacrifice.

12

## 13 **Generation of TERT-flox mice**

14 9kb fragment of TERT locus was subcloned and Lox-Puro-lox cassette from pBS.DAT-LoxStop plasmid  
15 (kindly gifted from David Tuveson) was inserted at the BsiWI site in the second intron. Another loxP  
16 sequence and NdeI site were inserted at the KasI site in the sixth intron. The targeting vector was  
17 linearized and electroporated into J1 mouse ES cells. After positive selection with puromycin, correctly  
18 targeted ES clones were selected by long-range PCR and Southern blotting, and then injected into  
19 C57BL6 blastocysts to generate the knock-in line. To remove floxed Puro cassette, the knock-in line was  
20 crossed with CMV-cre mice <sup>45</sup> and puro-negative TERT-floxed mice were selected by PCR and Southern  
21 blotting using genomic DNA from tail tips. *TERT<sup>flox/+</sup>* mice were born at normal Mendelian frequency.

22

## 23 **Lineage tracing assay.**

24 After tamoxifen injection, testes were detunicated, dissociated using fine forceps in PBS containing  
25 1mg/ml collagenase IV (Worthington) for 10min to remove interstitial cells, and placed in cold PBS.  
26 Images were captured with a fluorescent dissection microscope and the patch number and length were

1 measured with ImageJ. Total patch length was calculated by multiplying the patch number by the  
2 average patch length.

#### 3 4 **Whole-mount Immunofluorescence of seminiferous Tubules**

5 Seminiferous tubules were dissociated using fine forceps in PBS containing 1mg/ml collagenase IV for  
6 10min, fixed with 4%PFA at 4°C for 2h, cleared with 0.1% Igepal CA-630 (Sigma-Aldrich) in PBST, and  
7 dehydrated and rehydrated by immersing in a gradient of methanol diluted with PBST (25%, 50%, 75%,  
8 100%, 75%, 50%, 25%) at 4°C for 5min each. After washing in PBST, tubules were incubated in  
9 blocking buffer (0.5% BSA PBST) (Sigma-Aldrich), followed by incubation with antibodies in Immuno  
10 shot immunostaining Mild (Cosmo Bio) at 4°C for two days. After extensive wash with PBST, tubules  
11 were incubated with secondary antibodies in blocking buffer at room temperature for 90min, washed  
12 with PBST, and then mounted in Vectashield with DAPI (Vector laboratories). Images were captured on  
13 a Leica SP5 confocal microscope and processed in Photoshop.

#### 14 15 **Section immunostaining**

16 Testes were detunicated, fixed with 4% PFA at 4°C overnight, incubated in a gradient ethanol, xylene,  
17 embedded in paraffin, and cut into 5- $\mu$ m sections. After rehydration, antigen retrieval using Antigen  
18 retrieval solution citric acid or tris-based (Vector) for 10min in a pressure cooker. Sections were blocked,  
19 incubated with primary antibody at 4°C overnight. After washing with PBS, sections were incubated with  
20 secondary antibodies at room temperature for 1h and mounted in Vectashield with DAPI. For co-staining  
21 using rabbit anti-RFP antibodies and rabbit anti-PLZF antibodies, sections were antigen retrieved,  
22 incubated with anti-RFP antibody, then with HRP-conjugated anti-rabbit secondary antibody as  
23 described above, and signals were detected with TSA plus Cyanine 3 system (Perkin Elmer). Those  
24 antibodies were stripped off by antigen retrieval, and sections were further stained with BrdU,



1 cleaved-PARP, or PLZF antibodies. For BrdU detection, those slides were treated with 2N HCl for 20min,  
2 incubated with rabbit ant-PLZF and rat anti-BrdU antibodies at 4°C overnight, and signals were detected  
3 by Alexa488-conjugated anti-rat IgG and Cy5-conjugated anti-rabbit IgG antibodies. For cleaved-PARP  
4 detection, slides were incubated with rabbit ant-PLZF and mouse anti-cleaved PARP antibodies at 4°C  
5 overnight, and signals were detected by Alexa488-conjugated anti-mouse IgG and Cy5-conjugated  
6 anti-rabbit IgG antibodies. For triple staining using rabbit anti-RFP, rabbit anti-PLZF, and rabbit c-MYC  
7 antibodies, sections were stained with anti-Tdtomato antibody using TSA plus Cyanine 3 system, and  
8 antibodies were stripped off. Then those sections were stained with anti-MYC antibody with TSA plus  
9 fluorescein system (Perkin Elmer) followed by antigen retrieval to remove antibodies. Finally, the  
10 sections were further stained with anti-PLZF antibody and Cy5 conjugated anti-rabbit IgG. Slides were  
11 mounted in Vectashield with DAPI. Images were captured on a fluorescent microscope and processed in  
12 Photoshop. Signal intensity of c-MYC signal was quantified with Image J.

13

#### 14 **TRAP assays (Telomeric Repeat Amplification Protocol).**

15 A two-step TRAP procedure was performed as previously reported<sup>46</sup>. Extract fractions from whole testis  
16 at 3 weeks or FACS-sorted undifferentiated spermatogonia were incubated with telomeric primers for a  
17 30 min initial extension step at 30°C in a PCR machine, followed by 5 min inactivation at 72°C. Without  
18 purification, 1µl of the extended reaction was PCR amplified (cycles of 30 seconds at 94°C, followed by  
19 30 seconds at 59°C) in presence of <sup>32</sup>P end-labeled telomeric primers that has been purified using a  
20 micro-spin G-25 column (GE healthcare). PCR reactions were resolved by 9% polyacrylamide gel  
21 electrophoresis at room temperature, and the gel was exposed to a phosphor-imager and scanned by a  
22 Typhoon scanner. The scanned image was quantitated using the TotalLab Quant software.  
23 Representative gel images were presented among at least 2 repeats.

24

#### 25 **FACS analysis**

1 Testes were detunicated, lightly dissociated in PBS, and incubated in PBS containing DNase I  
2 (Worthington) and 1mg/ml collagenase I (Worthington) at 32°C for 10 min. Cells were centrifuged at  
3 250g for 5min and supernatant was removed. After repeating collagenase I treatment, testicular cells  
4 were further digested with TrypLE Express (GIBCO) at 32°C for 15 min. During enzymatic digestions,  
5 seminiferous tubules were mechanically fragmented with vigorous pipetting every 5min. Cells were  
6 sequentially filtered with 70 µm and 40 µm strainers, resuspended in cold FACS buffer (2% FBS, 1mM  
7 EDTA in PBS), and incubated with antibodies on ice for 30min. After PBS wash, cells were resuspended  
8 in cold FACS buffer containing DAPI, and analyzed and sorted with a BD Aria II (BD Biosciences). Data  
9 was analyzed with FlowJo software. The list of antibodies is available in supplemental table.

10

#### 11 **RNA in situ hybridization**

12 5 days post labeling, testes were collected and Tdtomato+ undifferentiated spermatogonia were  
13 FACS-sorted, and cytopun at 300 r.p.m. for 5 min onto slides. Slides were fixed in 4% (v/v) PFA for 30  
14 min at room temperature and processed for single-molecule RNA FISH using RNAscope 2.5 HD  
15 Reagent KIT-RED (Advanced Cell Diagnostics) and probes against mouse *Tert* or *Trp53* (Advanced Cell  
16 Diagnostics) according to the manufacturer's instructions.

17

#### 18 **Quantitative RT-PCR**

19 For qRT-PCR, cells were directly sorted into Trizol LS (Thermo Fisher Scientific) by FACS and mixed  
20 with 100ng yeast tRNA as carrier. RNA was purified Direct-zol RNA Microprep (Zymo Research) and  
21 cDNA was synthesized using oligo-dT and SuperScript IV First-Strand Synthesis system (Thermo Fisher  
22 Scientific). For qRT-PCR of *Tert* and mouse *Myc*, Universal Probe Library Probe #066 and #72 (Roche)  
23 were used, respectively. For these reactions, TaqMan Fast Advanced Master Mix (Thermo Fisher  
24 Scientific) were used. For other qRT-PCR, PowerUp SYB Green Master Mix (Thermo Fisher Scientific)

1 was used according to the product manual. PCR analysis was done with a 7900HT Fast Real-Time PCR  
2 System machine (ABI). List of primers is available in supplemental table.

3

#### 4 **RNA-sequencing**

5 US-h cells were directly sorted into Trizol LS by FACS and RNA was purified using Direct-zol RNA  
6 Microprep. Genomic DNA was digested with on-column DNase treatment. RNA quality was checked by  
7 Bioanalyzer 2100 (Agilent). RNA-seq libraries were constructed using SMARTer Stranded Total  
8 RNA-seq Kit v2 – Pico Input Mammalian (Clontech), starting from 5ng total RNA. cDNA was synthesized  
9 and amplified according to the manual. After the rRNA removal step, cDNA was amplified with 13 cycles  
10 of PCR reactions. Quality of purified cDNA libraries was confirmed by Bioanalyzer 2100 and  
11 concentration of cDNA. Libraries were sequenced on the Illumina NextSeq platform, generating about  
12 16-24 million 75-bp paired-end reads per library. Four biological replicates per sample were analyzed.  
13 Raw reads were trimmed by TrimGalore 0.4.0 (Babraham Bioinformatics), mapped to mm10 by tophat  
14 2.0.13<sup>47</sup>, analyzed by the DEseq2 packages<sup>48</sup>.

15

#### 16 **ATAC-sequencing**

17 ATAC-seq libraries were made as described previously<sup>49</sup> using the Omni-ATAC protocol. Adjustments  
18 to the protocol were made to reflect two primary features of the cell types profiled in this work. First, the  
19 amount of Tn5 transposase added to each reaction was modulated to maintain proportionality with the  
20 number of cells assayed. For example, a normal reaction uses 50,000 cells and 2.5 ul of Tn5  
21 transposase in a 50 ul reaction. In the case of rarer spermatogonial stem cells, only 5,000 cells could be  
22 obtained so only 0.25 ul of Tn5 transposase was used in a 50 ul reaction. The difference in volume was  
23 adjusted using water. Second, the ploidy of each cell type was taken into account and the amount of Tn5  
24 was adjusted based on ploidy as well. For example, round spermatid cells are haploid, so transposition  
25 of 50,000 cells would require 1.25 ul of Tn5 transposase in a 50 ul reaction. Similarly, spermatocytes are  
26 4N meiotic cells so the amount of Tn5 transposase was increased proportionately and the amount of

1 water in the reaction was reduced. In all cases, regardless of cell number or ploidy, the reaction volume  
2 of the transposition reaction was kept constant at 50 ul. All ATAC-seq reactions were performed using  
3 homemade Tn5 transposase and Tagment DNA (TD) buffer<sup>50</sup>. Downstream amplification and  
4 purification of libraries was performed as described previously<sup>26,49,51</sup>.

5 ATAC-seq data pre-processing was completed using the PEPATAC pipeline  
6 (<http://code.databio.org/PEPATAC/>). The mm10 genome build (<https://github.com/databio/refgenie>) was  
7 used for alignment. Briefly, all fastq files were first trimmed to remove Illumina Nextera adapter  
8 sequence using Skewer<sup>52</sup> with “-f sanger -t 20 -m pe -x” options. FastQC  
9 (<http://www.bioinformatics.bbsrc.ac.uk/projects/fastqc>) was used to validate proper trimming and check  
10 overall sequence data quality. Bowtie2<sup>53</sup> was then used for pre-alignments to remove reads that would  
11 map to chrM (revised Cambridge Reference Sequence), alpha satellite repeats, Alu repeats, ribosomal  
12 DNA repeats, and other repeat regions with “-k 1 -D 20 -R 3 -N 1 -L 20 -i S,1,0.50 -X 2000 -rg-id” options.  
13 Bowtie2 was then used to align to the mm10 reference genome using “--very-sensitive -X 2000 --rg-id”  
14 options. Samtools<sup>54</sup> was used to sort and isolate uniquely mapped reads using “-f 2 -q 10 -b -@ 20”  
15 options. Picard (<http://broadinstitute.github.io/picard/>) was used to remove duplicates. Then the bam  
16 files were merged by conditions, and MAC2<sup>55</sup> was used to call peaks with parameter “-q 0.05 --nomodel  
17 --shift 0”. The narrow peaks were then filtered by the ENCODE 7 hg19 blacklist, as well as peaks that  
18 extend beyond the ends of chromosomes. Bedtools<sup>56</sup> was used to retrieve the reads of the called peaks  
19 for each sample with multicov module. All the samples have similar sequencing depth, mitochondrial rate,  
20 and duplication rate. The spermatocyte and the round spermatid samples have similar sequencing depth  
21 compared to all other samples, but slightly higher mitochondrial rate and lower duplication rate, so have  
22 more final reads after initial processing and filtering. To make all the samples comparable for the  
23 statistical analysis, we used final reads as the normalization factor. R package “DESeq2”<sup>48</sup> was used for  
24 statistical analysis to identify significant peaks between different conditions. The differential peaks were  
25 called between US-h CreER/+ and US-h CreER/flox samples. Peaks with FDR < 0.01 and fold change

1 larger than 2 or smaller than -2 were considered as significant. R packages “ChIPseeker”<sup>57</sup> was used for  
2 peak annotation. Package “ngsplot”<sup>58</sup> was used for visualization of cumulated peak signal.

3

4 **Statistics:** No statistical methods were used to predetermine sample sizes. When comparing two  
5 groups, *p* values were determined by two-sided unpaired *t*-test. When comparing more than two groups,  
6 *p* values were determined by one-way ANOVA with Tukey’s test. Values are presented as mean ± SEM.

7 The animals were randomly assigned to each experimental or control group. Graphs were generated by  
8 the Prism 8.

9

10 **Data availability:** The source data for the RNA-seq study are available in the NCBI Gene Expression  
11 Omnibus (GEO) repository under accession number GSE14659. All other data that support the finding  
12 of this study are available from the corresponding author upon reasonable request.

13

## 1 **Methods references**

- 2 40 Madisen, L. *et al.* A robust and high-throughput Cre reporting and characterization system for the  
3 whole mouse brain. *Nat Neurosci* **13**, 133-140, doi:10.1038/nn.2467 (2010).
- 4 41 Li, L. *et al.* Visualizing the distribution of synapses from individual neurons in the mouse brain.  
5 *PLoS One* **5**, e11503, doi:10.1371/journal.pone.0011503 (2010).
- 6 42 Felsher, D. W. & Bishop, J. M. Reversible tumorigenesis by MYC in hematopoietic lineages. *Mol*  
7 *Cell* **4**, 199-207, doi:10.1016/s1097-2765(00)80367-6 (1999).
- 8 43 Blasco, M. A. *et al.* Telomere shortening and tumor formation by mouse cells lacking telomerase  
9 RNA. *Cell* **91**, 25-34, doi:10.1016/s0092-8674(01)80006-4 (1997).
- 10 44 Marino, S., Vooijs, M., van Der Gulden, H., Jonkers, J. & Berns, A. Induction of  
11 medulloblastomas in p53-null mutant mice by somatic inactivation of Rb in the external granular  
12 layer cells of the cerebellum. *Genes Dev* **14**, 994-1004 (2000).
- 13 45 Zinyk, D. L., Mercer, E. H., Harris, E., Anderson, D. J. & Joyner, A. L. Fate mapping of the mouse  
14 midbrain-hindbrain constriction using a site-specific recombination system. *Curr Biol* **8**, 665-668  
15 (1998).
- 16 46 Chen, L. *et al.* An Activity Switch in Human Telomerase Based on RNA Conformation and  
17 Shaped by TCAB1. *Cell* **174**, 218-230 e213, doi:10.1016/j.cell.2018.04.039 (2018).
- 18 47 Kim, D. *et al.* TopHat2: accurate alignment of transcriptomes in the presence of insertions,  
19 deletions and gene fusions. *Genome Biol* **14**, R36, doi:10.1186/gb-2013-14-4-r36 (2013).

- 1 48 Love, M. I., Huber, W. & Anders, S. Moderated estimation of fold change and dispersion for  
2 RNA-seq data with DESeq2. *Genome Biol* **15**, 550, doi:10.1186/s13059-014-0550-8 (2014).
- 3 49 Corces, M. R. *et al.* An improved ATAC-seq protocol reduces background and enables  
4 interrogation of frozen tissues. *Nat Methods* **14**, 959-962, doi:10.1038/nmeth.4396 (2017).
- 5 50 Picelli, S. *et al.* Tn5 transposase and tagmentation procedures for massively scaled sequencing  
6 projects. *Genome Res* **24**, 2033-2040, doi:10.1101/gr.177881.114 (2014).
- 7 51 Buenrostro, J. D., Wu, B., Chang, H. Y. & Greenleaf, W. J. ATAC-seq: A Method for Assaying  
8 Chromatin Accessibility Genome-Wide. *Curr Protoc Mol Biol* **109**, 21 29 21-21 29 29,  
9 doi:10.1002/0471142727.mb2129s109 (2015).
- 10 52 Jiang, H., Lei, R., Ding, S. W. & Zhu, S. Skewer: a fast and accurate adapter trimmer for  
11 next-generation sequencing paired-end reads. *BMC Bioinformatics* **15**, 182,  
12 doi:10.1186/1471-2105-15-182 (2014).
- 13 53 Langmead, B. & Salzberg, S. L. Fast gapped-read alignment with Bowtie 2. *Nat Methods* **9**,  
14 357-359, doi:10.1038/nmeth.1923 (2012).
- 15 54 Li, H. *et al.* The Sequence Alignment/Map format and SAMtools. *Bioinformatics* **25**, 2078-2079,  
16 doi:10.1093/bioinformatics/btp352 (2009).
- 17 55 Zhang, Y. *et al.* Model-based analysis of ChIP-Seq (MACS). *Genome Biol* **9**, R137,  
18 doi:10.1186/gb-2008-9-9-r137 (2008).
- 19 56 Quinlan, A. R. & Hall, I. M. BEDTools: a flexible suite of utilities for comparing genomic features.  
20 *Bioinformatics* **26**, 841-842, doi:10.1093/bioinformatics/btq033 (2010).

- 1 57 Yu, G., Wang, L. G. & He, Q. Y. ChIPseeker: an R/Bioconductor package for ChIP peak  
2 annotation, comparison and visualization. *Bioinformatics* **31**, 2382-2383,  
3 doi:10.1093/bioinformatics/btv145 (2015).
- 4 58 Shen, L., Shao, N., Liu, X. & Nestler, E. ngs.plot: Quick mining and visualization of  
5 next-generation sequencing data by integrating genomic databases. *BMC Genomics* **15**, 284,  
6 doi:10.1186/1471-2164-15-284 (2014).  
7



1

2 **Acknowledgments:** We are grateful to members of the Artandi lab, and to Hosu Sin, Julien Sage,  
3 Roel Nusse, Dean Felsher and Margaret Fuller for critical comments. We thank Pauline Chu for  
4 expert assistance with histology. Confocal imaging analysis was performed in the Stanford Cell  
5 Sciences Imaging Facility. Cell sorting/flow cytometry analysis for this project was performed  
6 using the Stanford Shared FACS Facility. Next generation sequencing for this project was  
7 performed using the Stanford Functional Genomics Facility. This work was supported by NIH  
8 grants CA197563 and AG056575 (to S.E.A) and CA209919 (to H.Y.C.). K.H. was supported by  
9 a Japan Society for the Promotion of Science Overseas Research Fellowship.

10

11 **Contributions:** Conceptualization, K.H. and S.E.A.; Methodology; K.H., Y.Z., R.C., P.C., and  
12 S.E.A.; Formal analysis, K.H., Y.Z., A.G., and Y.W.; Investigation, K.H., L.C., R.C., and P.C.;  
13 Writing original draft, K.H. and S.E.A.; Supervision, S.E.A., H.Y.C.; Funding acquisition, K.H.,  
14 S.E.A., and H.Y.C.

15

16 **Author information:** H.Y.C. is a co-founder of Accent Therapeutics, Boundless Bio, and an  
17 advisor to 10x Genomics, Arsenal Biosciences, and Spring Discovery. Correspondence and  
18 requests for materials should be addressed to S.E.A. (sartandi@stanford.edu).

19

1 **Figure legends**

2 **Fig. 1. TERT deletion impairs SSC-mediated clone formation. (a)**  $Tert^{CreER/+} Rosa^{Isl-Tdtomato/+}$  mice. **(b)**  
3 Lineage tracing using *Tert-CreER*. **(c)** Epifluorescence of Tdtomato and bright field image of untangled  
4 seminiferous tubules in a single whole testis at 3 months after 1mg tamoxifen injection. Scale bars, 5mm.  
5 **(d-f)** Mean patch number (d), mean patch length (e), and total patch length (f) after pulse labeling with  
6 indicated tamoxifen dose and span (n=6, 6, 6, 4, 6, 5 mice from left to right). **(g)**  
7  $Tert^{CreER/flox}; Rosa^{Isl-Tdtomato/+}$  mice. **(h)** Whole mount immunofluorescence of GFRA1 and Tdtomato. Scale  
8 bars, 100 $\mu$ m. **(i)** Quantification of Tdtomato<sup>+</sup> cells within GFRA1<sup>+</sup> A<sub>s</sub> and A<sub>pr</sub> cells (n=4 mice per group).  
9 **(j)** In situ hybridization against *Tert* mRNA in purified Tdtomato<sup>+</sup> US at 5 days post-tamoxifen treatment.  
10 Undifferentiated spermatogonia from  $Tert^{CreER/CreER}$  mice was used as negative control. Scale bars,  
11 40 $\mu$ m. **(k)** Quantification of foci of *Tert* mRNA (n=232, 243, 341 cells from left to right). **(l)**  
12 Epifluorescence of Tdtomato in untangled seminiferous tubules at 3 months and 6 months  
13 post-tamoxifen injection. Scale bars, 5mm. **(m-o)** Quantification of mean patch number (m), mean patch  
14 length (n), and total patch length (o) (n=7, 7, 9, 8 mice from left to right). Data are represented as Mean  $\pm$   
15 SEM.

16  
17 **Fig. 2. TERT promotes SSC competition independent of its catalytic activity and the telomerase**  
18 **complex. (a)**  $Tert^{CreER/flox}; Rosa^{Isl-Tdtomato/Isl-tTA}; TetO-Tert$  or  $-Tertci$  mice. **(b)** Epifluorescence for Tdtomato  
19 in untangled seminiferous tubules at 3 months after tamoxifen injection. Scale bars, 5mm. **(c-e)**  
20 Quantification of mean patch number (c), mean patch length (d), and total patch length (e) (n=6 mice per  
21 group). **(f)** Quantification of TdTomato<sup>+</sup>, GFRA1<sup>+</sup> A<sub>s</sub> and A<sub>pr</sub> cells at 7 or 14 days post labeling (n=5, 5, 5,  
22 5, 6, 6, 5, 5 mice from left to right). **(g)** Mean patch number at 6 weeks after tamoxifen injection (n=5  
23 mice per group). **(h)** Quantification of percent Tdtomato<sup>+</sup> clones containing PLZF<sup>+</sup> cells (n=5,4 mice from  
24 left to right). **(i)** Quantification of BrdU<sup>+</sup> cells in Tdtomato<sup>+</sup>, PLZF<sup>+</sup> undifferentiated spermatogonia (n=6, 5,  
25 5, 6 mice from left to right). Data are represented as Mean  $\pm$  SEM.

26

1 **Fig. 3. TERT deletion compromises chromatin accessibility in SSCs. (a)** Peak calls from ATAC-seq  
2 data. Peak calls from each cell type are shown individually. Color indicates the type of genomic region  
3 overlapped by the peak. **(b)** Average tag density of ATAC-seq reads around transcription start sites. **(c)**  
4 PCA of ATAC-seq data from US-h, US-m and DS cells purified from *Tert*<sup>CreER/+</sup> versus *Tert*<sup>CreER/flox</sup> mice.  
5 **(d)** Heatmap representation of 11656 peaks that are significantly different between *Tert*<sup>CreER/+</sup> and  
6 *Tert*<sup>CreER/flox</sup> in US-h, US-m, and DS or significantly more open either in SP or RS. Each row represents  
7 one ATAC-seq peak. Color represents the relative ATAC-seq accessibility. **(e)** Venn diagrams of the  
8 peaks in US-h, US-m and DS cells from *Tert*<sup>CreER/+</sup> and *Tert*<sup>CreER/flox</sup> mice.

9  
10 **Fig. 4. MYC rescues competitive clone formation of TERT-deleted SSCs. (a)** PCA of RNA-seq data  
11 from Tdtomato<sup>+</sup> US-h. **(b)** Significant down-regulation of MYC target genes in *Tert*<sup>CreER/flox</sup> US-h cells.  
12 RNA-seq data was analyzed using gene set enrichment analysis. **(c)** Quantification of mean signal  
13 intensity for MYC staining in PLZF<sup>+</sup> undifferentiated spermatogonia using testicular cross sections at 7  
14 days after labeling. **(d)** *Tert*<sup>CreER/flox</sup>:*Rosa*<sup>Isl-Tdtomato/Isl-tTA</sup>:*TetO-hMYC* mice. **(e)** Epifluorescence for  
15 Tdtomato in untangled seminiferous tubules. Scale bars, 5mm. **(f to h)** Quantification of mean patch  
16 number (f), mean patch length (g), and total patch length (h) (n=6, 8, 6 mice from left to right). **(i)**  
17 Quantification of Tdtomato<sup>+</sup> GFRA1<sup>+</sup> A<sub>s</sub> and A<sub>pr</sub> clones at 14 days post labeling detected by whole mount  
18 immunofluorescence (n=5 mice per group). **(j)** Quantitative analysis of Tdtomato<sup>+</sup> BrdU<sup>+</sup> PLZF<sup>+</sup>  
19 undifferentiated spermatogonia using testicular cross sections at 7 days post labeling (n=5 mice per  
20 group). Data are represented as Mean ± SEM.

21  
22 **Extended Data Figure 1. TERT expression in spermatogonia subpopulations. (a)**  
23 Spermatogenesis: seminiferous tubules are composed of four layers of male germ cells.  
24 Undifferentiated and differentiating spermatogonia located in the basement layer undergo mitosis. They  
25 translocate to the second layer when entering into meiosis and differentiate into spermatocytes. Haploid  
26 spermatids produced by meiosis move toward luminal side during post-meiotic maturation. **(b)** A

1 functional, morphological, and gene expression heterogeneity in spermatogonia subpopulations. **(c)**  
2 Flowcytometry analysis of wild-type testicular cells stained with  $\alpha 6$ -Integrin, MCAM, and KIT.  
3  $\alpha 6$ -Integrin-high cells were further separated into US-h, US-m, and DS based on KIT and MCAM  
4 expression. **(d)** qRT-PCR of *Tert* and spermatogonia markers in FACS-sorted US-h, US-m, and DS.  
5 Expression was normalized with *Actb* (n=3 mice per group). Data are represented as Mean  $\pm$  SEM. **(e)**  
6 Flowcytometry analysis of testicular cells from *Tert*<sup>Tdtomato/+</sup> mouse.  $\alpha 6$ -Integrin-high cells were gated and  
7 further separated according to KIT and MCAM expression. *Tert-Tdtomato* expression was compared in  
8 US-h, US-m, and DS.

9  
10 **Extended Data Figure 2. Marking and lineage tracing of TERT<sup>+</sup> cells.** **(a)** Immunofluorescence of  
11 Tdtomato and E-cadherin, a membrane marker of undifferentiated spermatogonia, in whole-mount  
12 seminiferous tubules at day two. Scale bars, 100 $\mu$ m. **(b)** Quantification of Tdtomato<sup>+</sup> cells in E-cadherin<sup>+</sup>  
13 undifferentiated spermatogonia (n=4 mice per group). Data are represented as Mean  $\pm$  SEM. **(c)**  
14 Whole-mount immunofluorescence of KIT and Tdtomato in a *Tert*<sup>CreER/+</sup>;*Rosa*<sup>Isl-Tdtomato/+</sup> testis at two days  
15 after high dose tamoxifen injection. Scale bars, 100 $\mu$ m. **(d)** Epifluorescence of Tdtomato in untangled  
16 seminiferous tubules at 3-month (3m) or 1-year (1yr) after pulse labeling; injected tamoxifen dose shown  
17 (0.25 – 4mg). Scale bars, 5mm. **(e)** Singly isolated Tdtomato<sup>+</sup> patch. Scale bar, 1mm. **(f)** Cross sections  
18 of testes immunostained with antibodies to Tdtomato at 3-month or 1-year after labeling. Scale bar,  
19 50 $\mu$ m.

20  
21 **Extended Data Figure 3. Conditional deletion of TERT in SSCs using *Tert-flox* mice.** **(a)** *Tert-flox*  
22 targeting strategy and Southern blot strategy. **(b)** Southern blot analysis of genomic DNA from mouse  
23 tails. Locations of 5' and 3' probes are shown in A. **(c)** TRAP assay using mouse embryonic fibroblasts  
24 from *Tert-flox* mice. Cells were transfected with adenovirus to express LacZ or Cre.

25

1 **Extended Data Figure 4. (a)** qRT-PCR analysis of *Tert* and *Tertci* in purified Tdtomato<sup>+</sup> undifferentiated  
2 spermatogonia at day 7. Effects of doxycycline addition to drinking water on *Tert* mRNA level.  
3 Expression was normalized with *Actb* (n=3 mice per group). **(b)** Telomere repeat amplification protocol  
4 (TRAP) assay using purified Tdtomato<sup>+</sup> undifferentiated spermatogonia from indicated genotypes. **(c)**  
5 *Tert*<sup>CreER/flox</sup>;*Rosa*<sup>Isl-Tdtomato/+</sup>;*Terc*<sup>-/-</sup> mice. **(d)** TRAP assay using whole testes from *Tert*<sup>CreER/+</sup>;*Terc*<sup>+/+</sup> and  
6 *Tert*<sup>CreER/+</sup>;*Terc*<sup>-/-</sup> mouse. **(e)** Epifluorescence of Tdtomato in untangled seminiferous tubules. Scale bars,  
7 5mm. **(f-h)** Quantification of mean patch number (d), mean patch length (e), and total patch length (f)  
8 (n=7, 6, 8, 7). Data are represented as Mean ± SEM.

9  
10 **Extended Data Figure 5. Persistent clone loss phenotype of TERT-deleted spermatogonial stem**  
11 **cells with conditional P53 deletion. (a)** *Tert*<sup>CreER/flox</sup>;*Rosa*<sup>Isl-Ttomato/+</sup>;*Trp53*<sup>flox/flox</sup> mice. **(b)** *In situ*  
12 hybridization against *Trp53* mRNA. Tdtomato<sup>+</sup> undifferentiated spermatogonia were sorted out at 5 days  
13 post labeling and stained. **(c)** Quantification of foci number of *Trp53* mRNA (n=174 and 135 cells from  
14 left to right). **(d)** Epifluorescence of Tdtomato in untangled seminiferous tubules. Scale bars, 5mm. **(e-g)**  
15 Quantitative data of patch number (e), average patch length (f), and total patch length (g) (n=6, 6, 7,7  
16 mice from left to right). **(h)** Immunofluorescence of γH2AX, PLZF, and Tdtomato in testicular cross  
17 sections. *Tert*<sup>Tdtomato/Tdtomato</sup> (G6) mice were used as positive control for γH2AX staining. Scale bars, 30μm.  
18 **(i)** Quantification of γH2AX-positive undifferentiated spermatogonia (n=4 mice per group). Data are  
19 represented as Mean ± SEM.

20  
21 **Extended Data Figure 6. Apoptosis in TERT-deleted undifferentiated spermatogonia. (a)**  
22 Immunofluorescence for GFRA1 and TdTomato at 14 days post labeling with tamoxifen. Scale bars,  
23 100μm. **(b)** Epifluorescence for TdTomato in untangled seminiferous tubules at 6 weeks post labeling.  
24 Scale bars, 5mm. **(c)** Immunofluorescence for Tdtomato and PLZF, a marker of undifferentiated  
25 spermatogonia, using testis cross-sections at 6 weeks after tamoxifen injection. Scale bars, 50μm. **(d)**  
26 Immunofluorescence for Tdtomato, PLZF, and BrdU using testis cross sections. Scale bars, 50μm. **(e)**

1 Immunofluorescence of PLZF, Tdtomato, and apoptosis marker, cleaved-PARP (cPARP), on testicular  
2 cross-sections at 7 days after labeling. *Tert*<sup>Tdtomato/Tdtomato</sup> (G6) mice were used as positive control for  
3 cleaved-PARP staining. Scale bars, 50µm. **(f)** Quantification of Tdtomato<sup>+</sup> cleaved-PARP<sup>+</sup>  
4 undifferentiated spermatogonia (n=4 mice per group). Data are represented as Mean ± SEM.

5  
6 **Extended Data Figure 7. Global changes of open chromatin structure in undifferentiated**

7 **spermatogonia after acute deletion of TERT. (a)** Principal component analysis (PCA) of ATAC-seq  
8 data. Colors represent indicated cell types from *Tert*-heterozygous mice. Arrow indicates direction of  
9 differentiation. **(b)** Pearson correlation heatmaps of ATAC-seq samples. **(c)** Heatmap representation of  
10 7597 peaks showing significant differences across US-h, US-m, DS, SP, and RS. Each row represents  
11 one ATAC-seq peak. Color represents relative ATAC-seq accessibility. **(d and e)** Venn diagrams  
12 showing the number of peaks found in spermatogonia subpopulations. **(f)** KEGG pathway analysis of  
13 differential peaks between *Tert*<sup>CreER/+</sup> and *Tert*<sup>CreER/flox</sup> US-h.

14  
15 **Extended Data Figure 8. Changes in open chromatin structure at specific loci after acute deletion**

16 **of TERT. (a-d)** Read distribution of ATAC-seq data across different cell types. **(a)** *Tert* locus. **(b)** *Ret* and  
17 *Gfra1* loci. These genes are dominantly expressed in US-h. **(c)** *Cdh1* and *Zbtb16* loci. These genes are  
18 dominantly expressed in both US-h and US-m. **(d)** *Kit* and *Prm1/Prm2* loci. *Kit* is dominantly expressed  
19 in DS and *Prm1/Prm2* are dominantly expressed in RS.

20  
21 **Extended Data Figure 9. Down-regulation of multiple signaling pathways in TERT-deleted US-h.**

22 **(a)** Volcano plot of RNA-seq data of purified Tdtomato<sup>+</sup> US-h from *Tert*<sup>CreER/+</sup> and *Tert*<sup>CreER/flox</sup> mice.  
23 Genes showing the significant changes (more than 2-fold change and P<0.0001) were colored with red.  
24 **(b and c)** gene set enrichment analysis using RNA-seq data of US-h purified from *Tert*<sup>CreER/+</sup> and  
25 *Tert*<sup>CreER/flox</sup> mice. nES: normalized enrichment score. **(d)** Immunofluorescence for MYC, PLZF, and  
26 Tdtomato at day 7 after tamoxifen labeling. Scale bars, 50µm. **(e)** Quantification of mean signal

1 intensities for PLZF staining in undifferentiated spermatogonia (n=68, 71, 66, 78 cells from left to right).  
2 **(f)** qRT-PCR analysis of *Myc* mRNA in purified Tdtomato<sup>+</sup> US at day 7. Doxycycline was added to  
3 drinking water. Expression was normalized with *Actb* (n=3 mice per group). **(g)** qRT-PCR analysis of  
4 transgenic human *MYC* mRNA in purified Tdtomato<sup>+</sup> US at day 7 after tamoxifen labeling. Doxycycline  
5 was added to drinking water. Expression was normalized with *Actb* (n=3 mice per group). n.d.; not  
6 detected. **(h)** qRT-PCR analysis of MYC pathway genes that were significantly down-regulated in gene  
7 set enrichment analysis in figure 4b. Tdtomato<sup>+</sup> US-h cells were purified at day 7 post labeling by FACS  
8 and cDNA was synthesized. Expression level was normalized with *Actb* (n=6,6,5,5,5 mice from left to  
9 right).

10

#### 11 **Extended Data Figure 10. Model for SSC competition driven by non-canonical functions of TERT.**

12 Summary schematic of catalytic activity-independent functions of TERT in stem cell competition.  
13 TERT-deleted SSCs are progressively eliminated from SSC pool through cell competition, reducing the  
14 contribution of TERT-deleted SSCs to spermatogenesis over time (left). In wild-type SSCs, TERT  
15 promotes competitive clone formation by up-regulating MYC protein. In SSCs lacking TERT,  
16 downregulation of MYC protein promotes rapid differentiation, impaired proliferation, and global loss of  
17 chromatin accessibility. MYC expression bypasses the requirement for non-canonical TERT, restoring  
18 SSC-mediated clone formation.

19



Hasegawa et. al. Figure 1

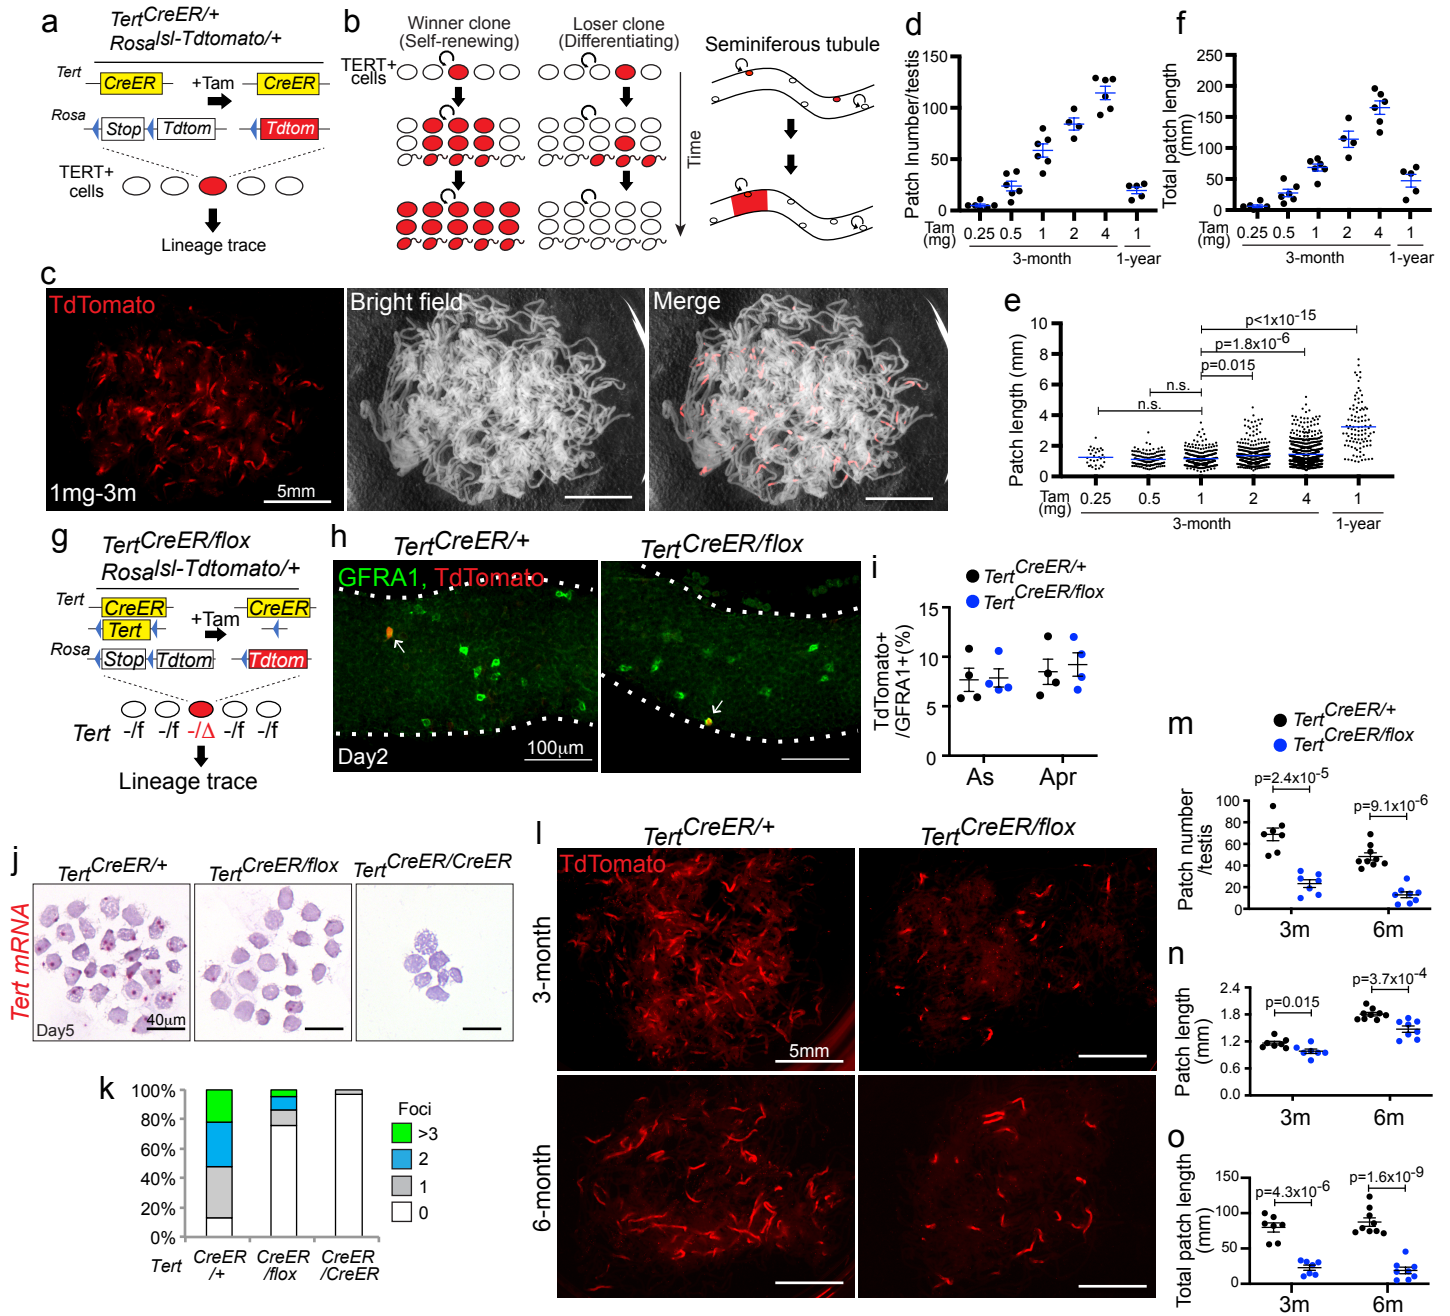



Hasegawa et al. Figure 2

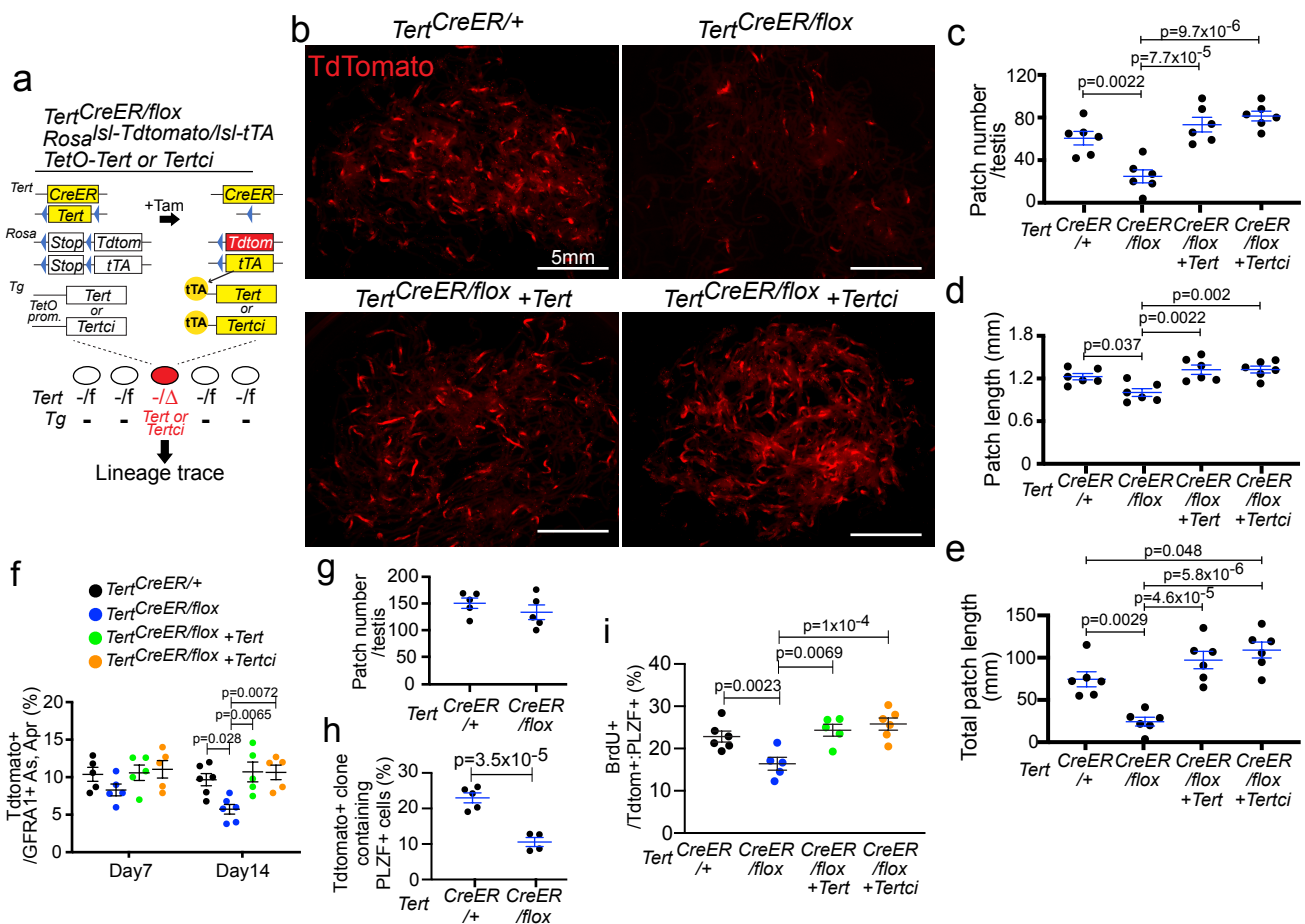

Hasegawa et al. Figure 3

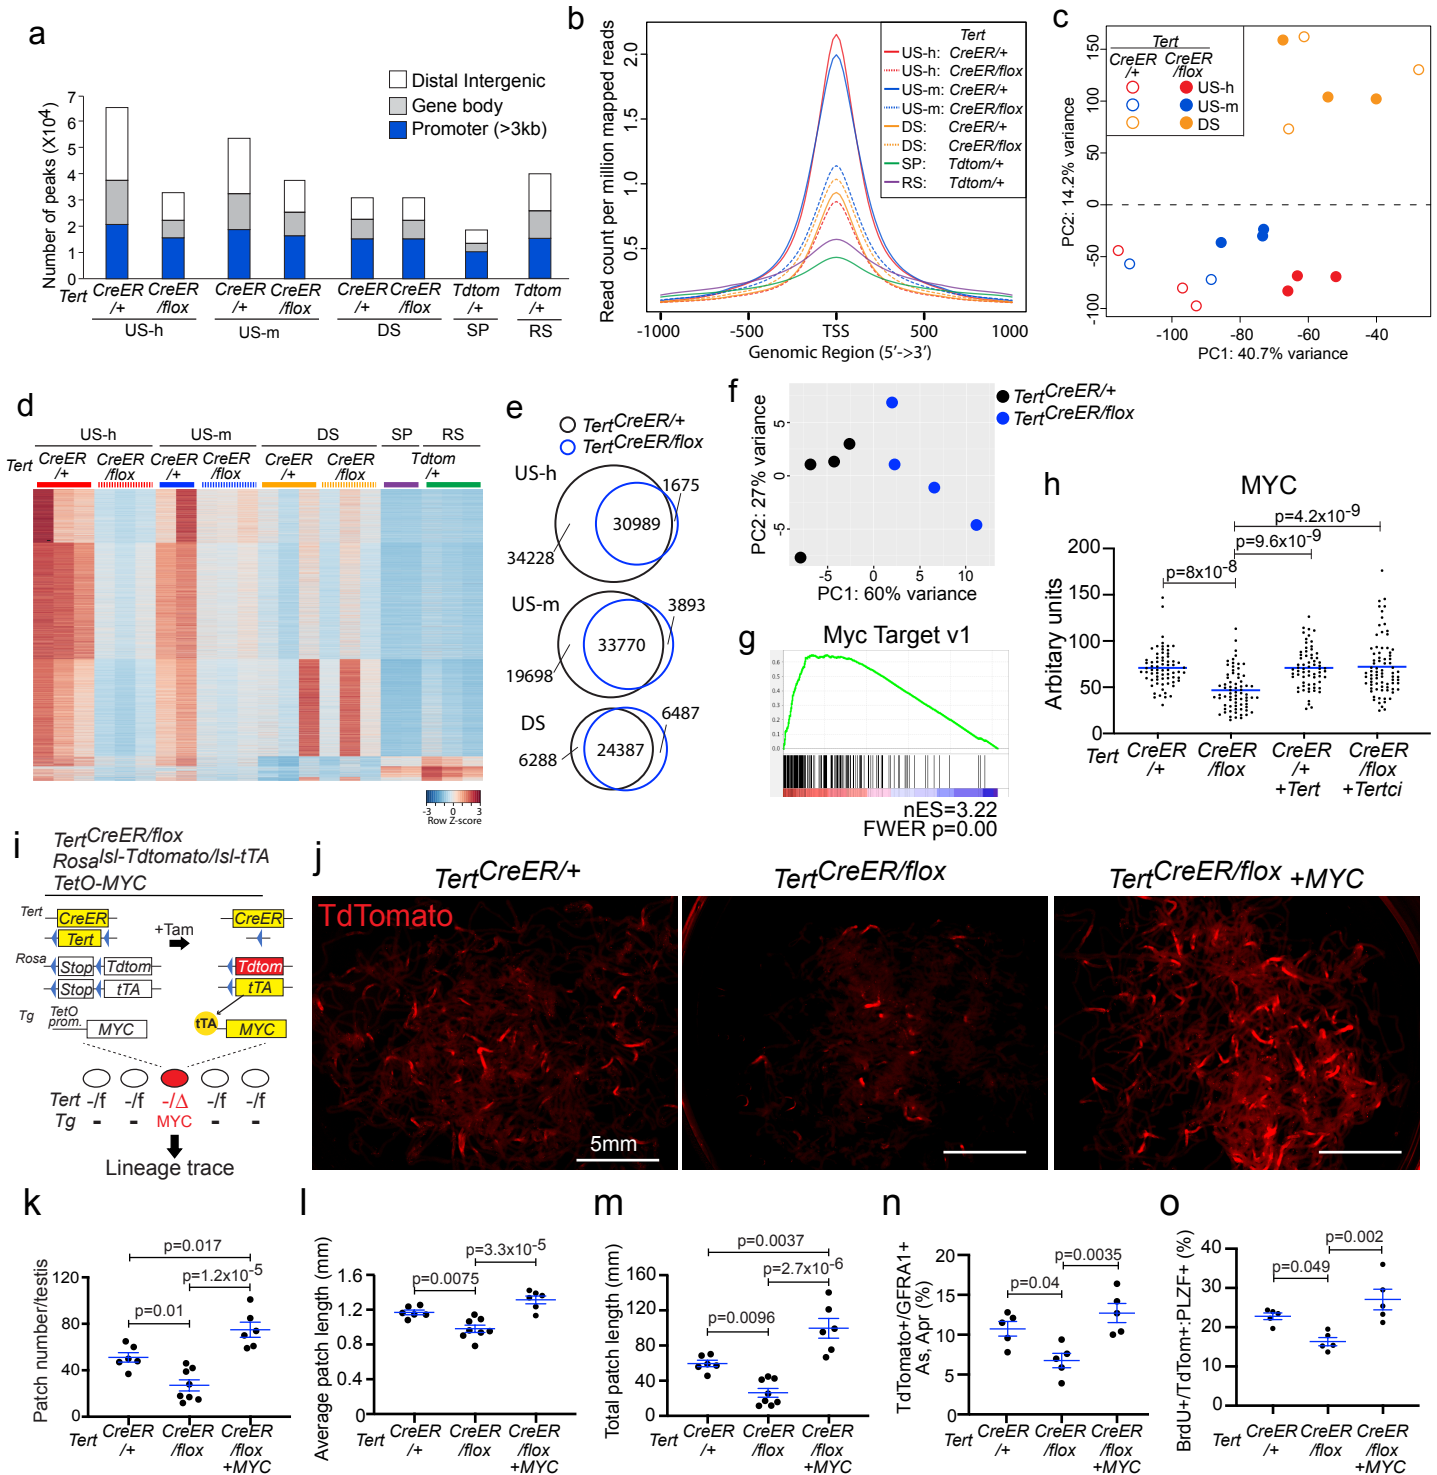

Hasegawa et al. Figure 4

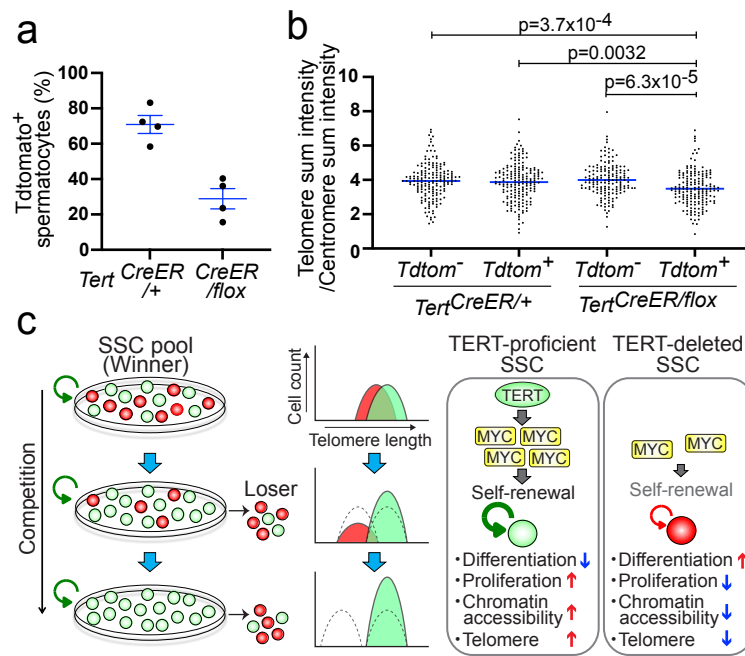

Source: https://www.biorxiv.org/content/10.1101/2021.04.28.441728v3.full.pdf
