# Supplementary material for: Clonal inactivation of telomerase promotes accelerated stem cell differentiation
Source: bioRxiv or medRxiv preprint supplement (doi:10.1101/2021.04.28.441728), 2022-06-05

Hasegawa et al. Extended Data Fig. 1

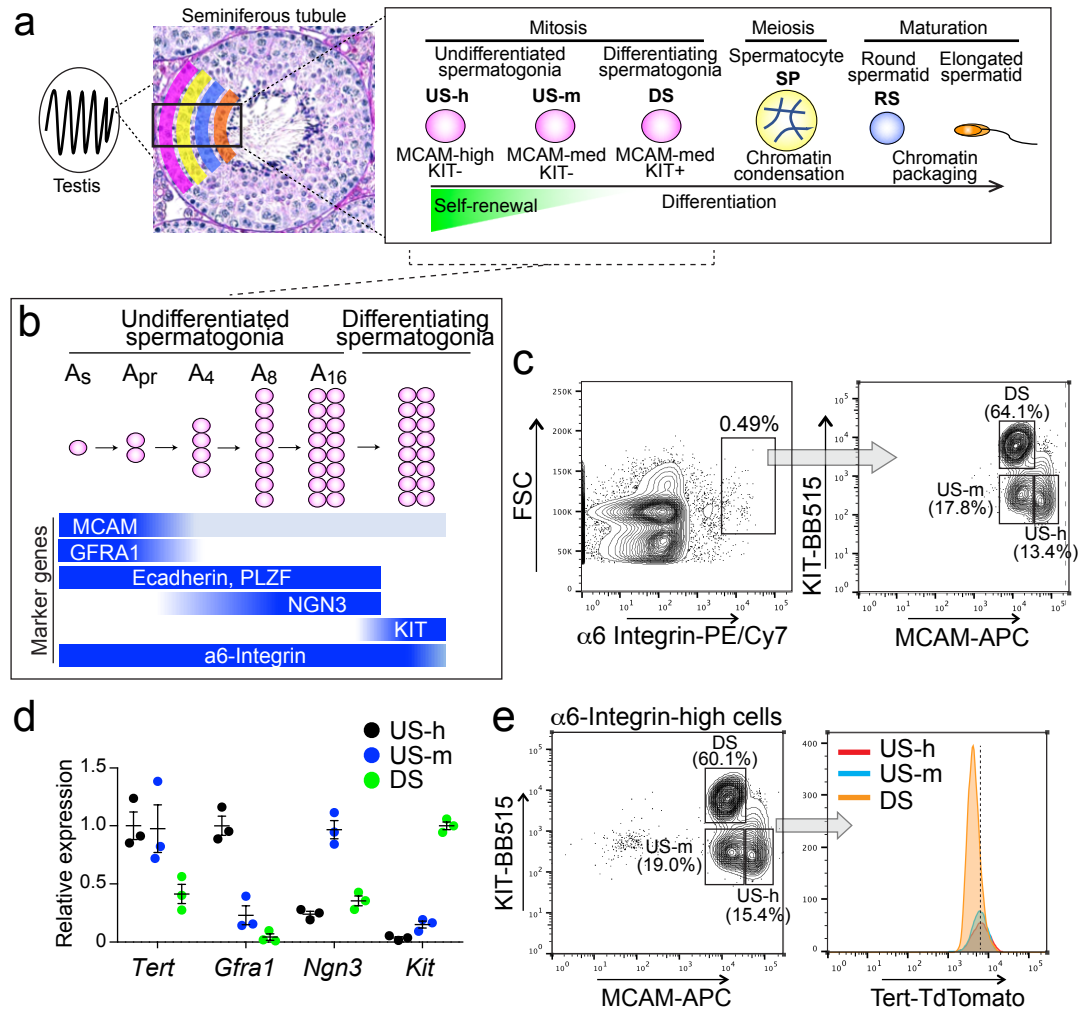

Hasegawa et al. Extended Data Fig. 2

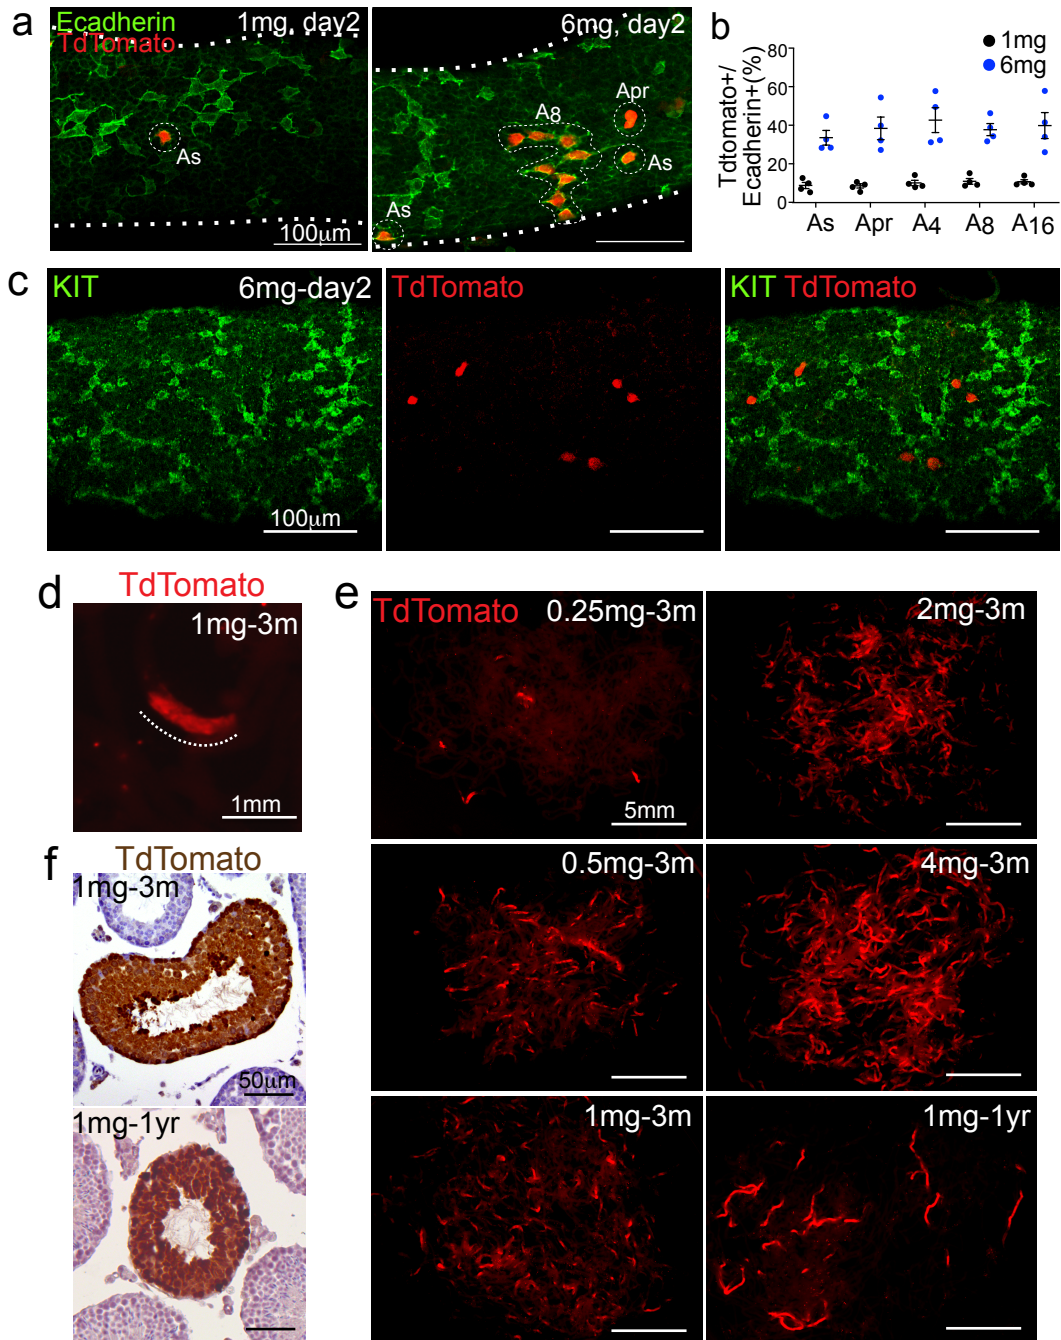

Hasegawa et al. Extended Data Fig. 3

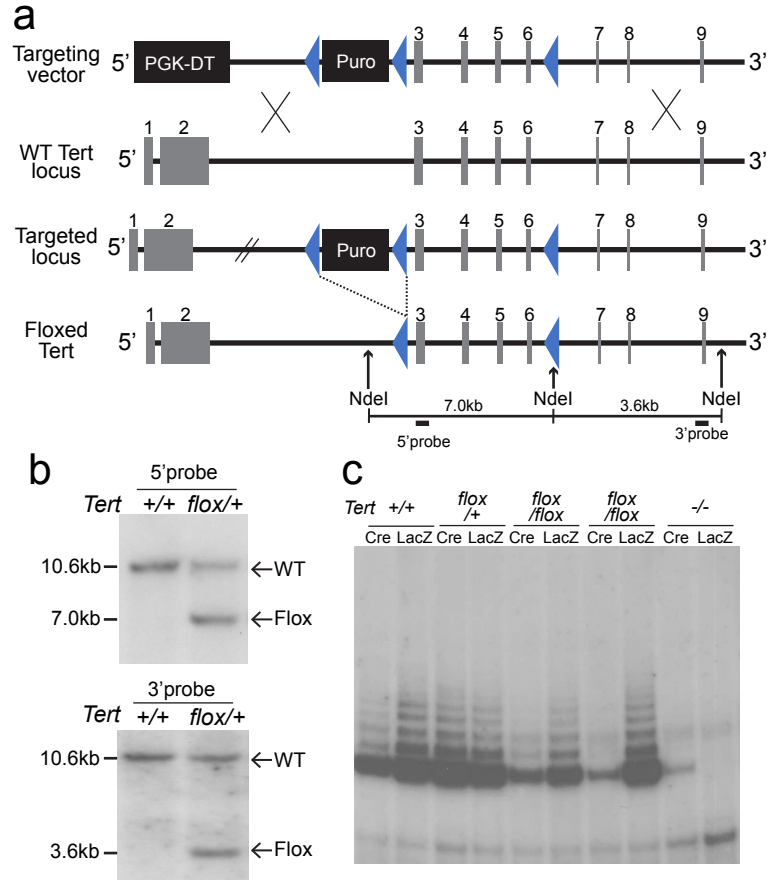

Hasegawa et. al. Extended Data Fig. 4

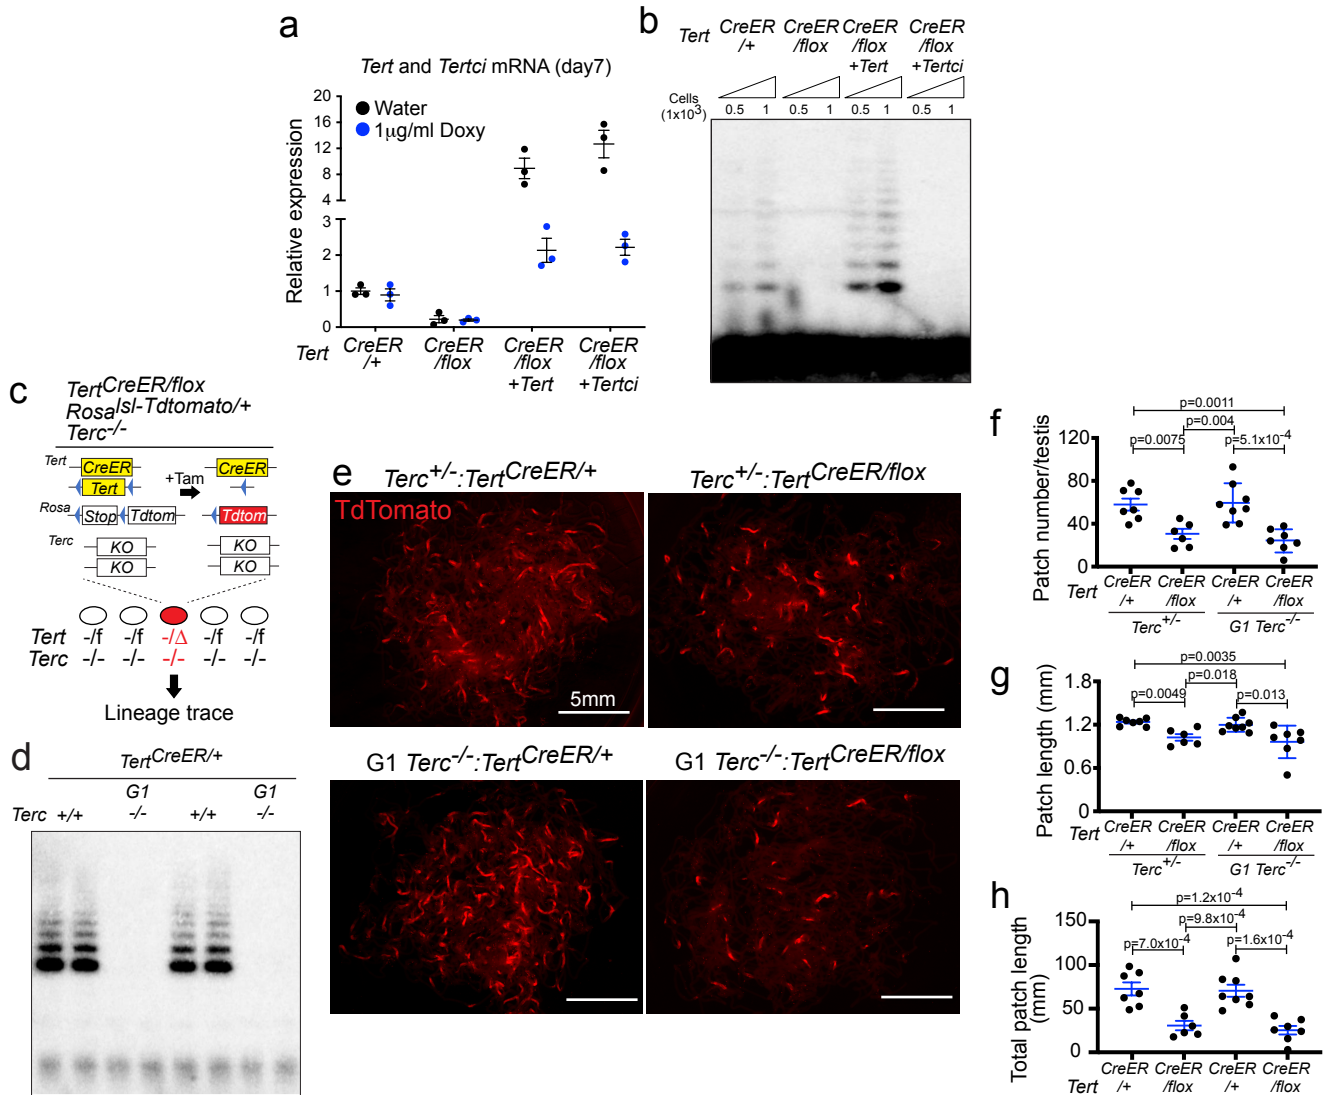

Hasegawa et al. Extended Data Fig. 5

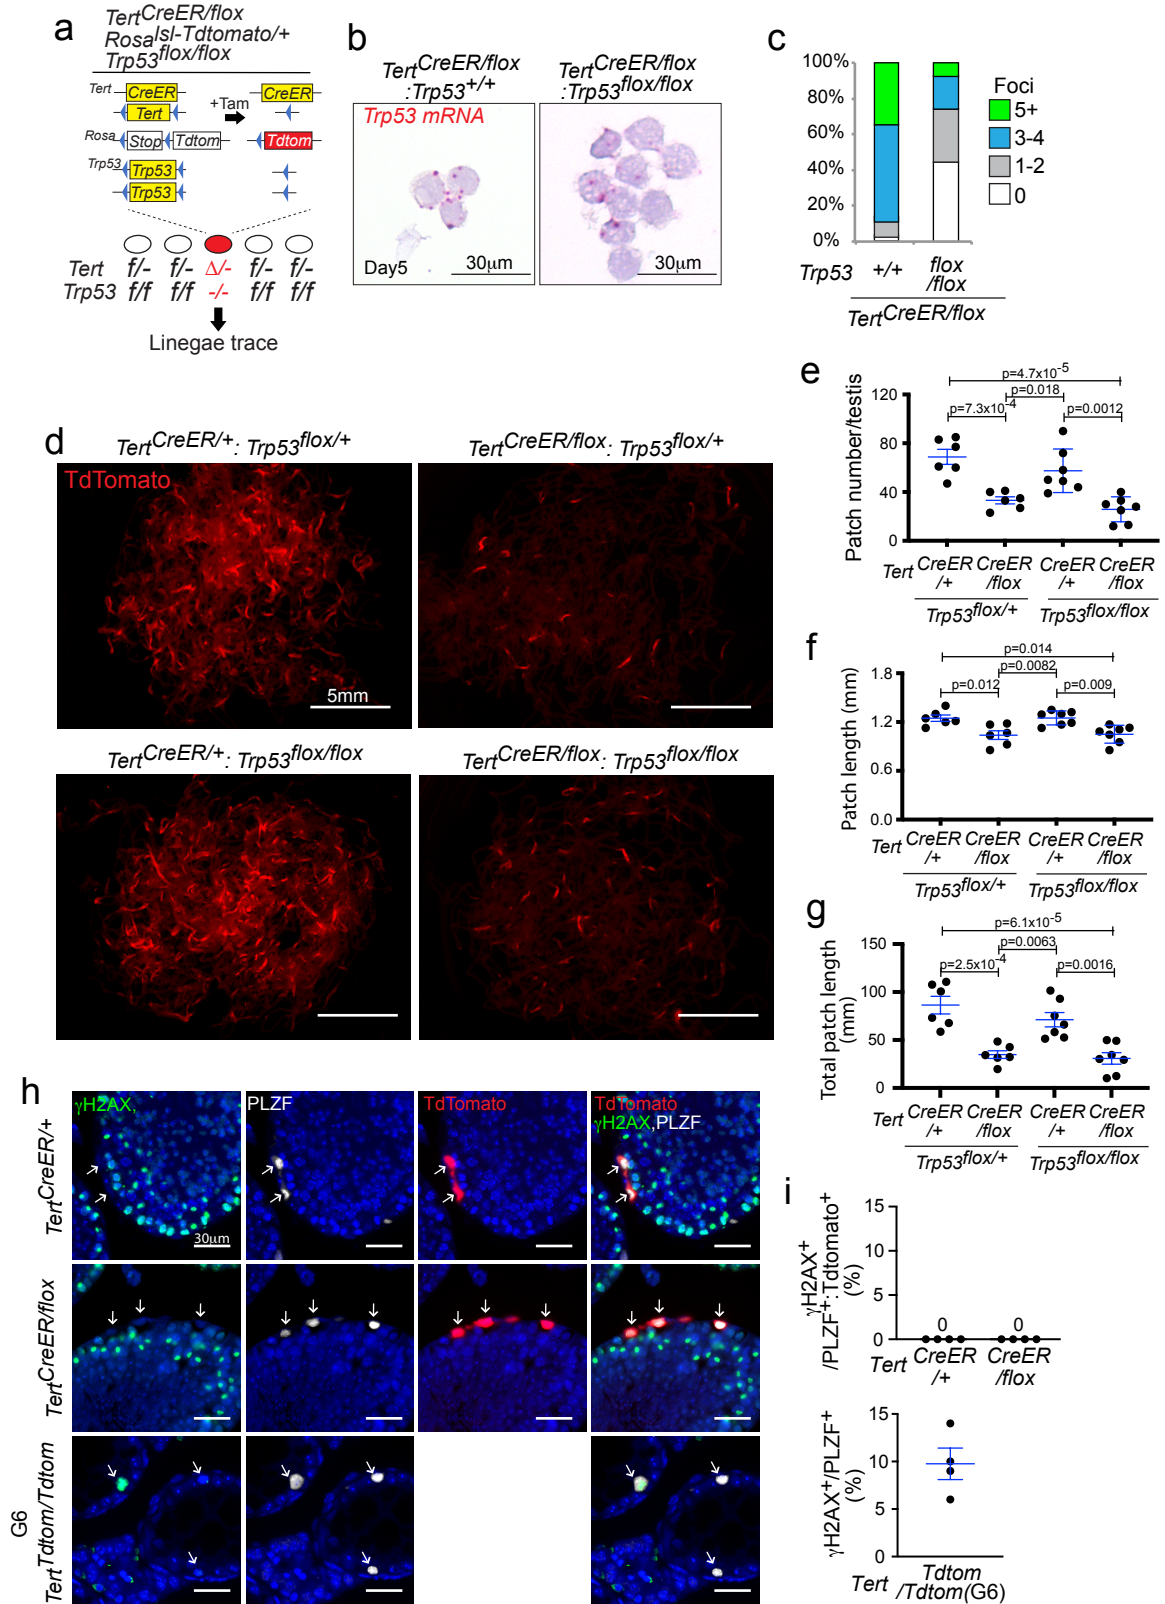

Hasegawa et al. Extended Data Fig. 6

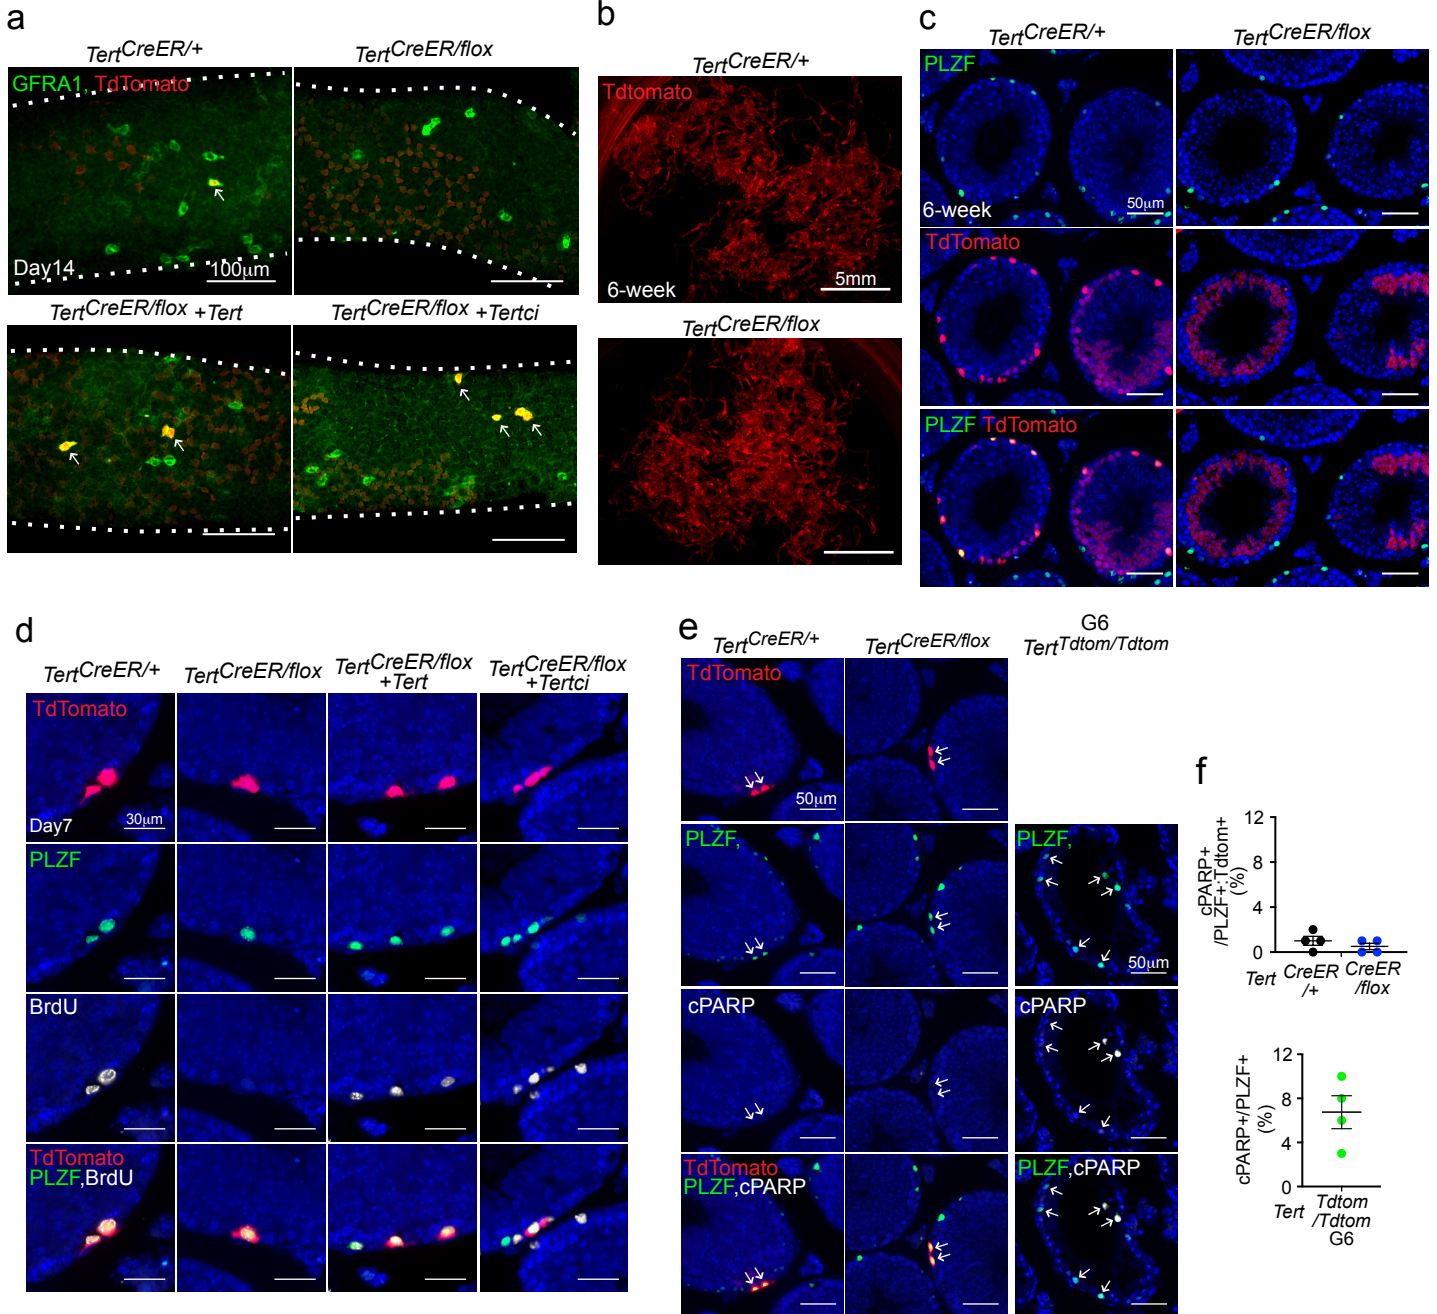

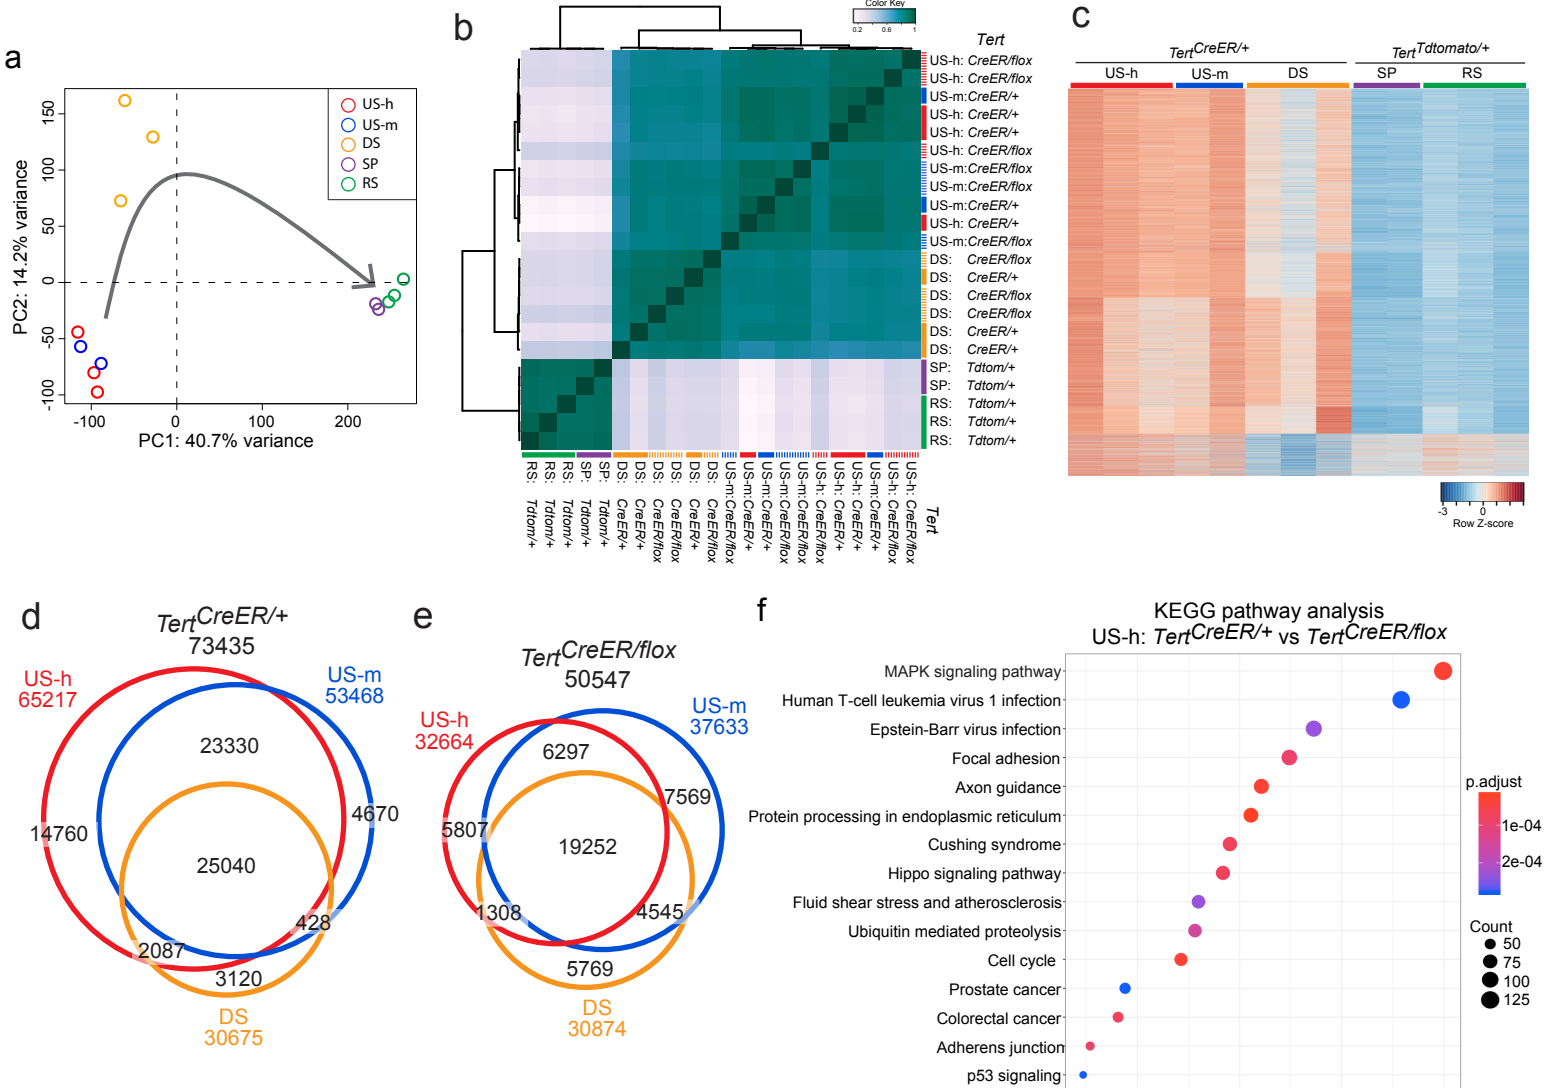

Hasegawa et al. Extended Data Fig. 8

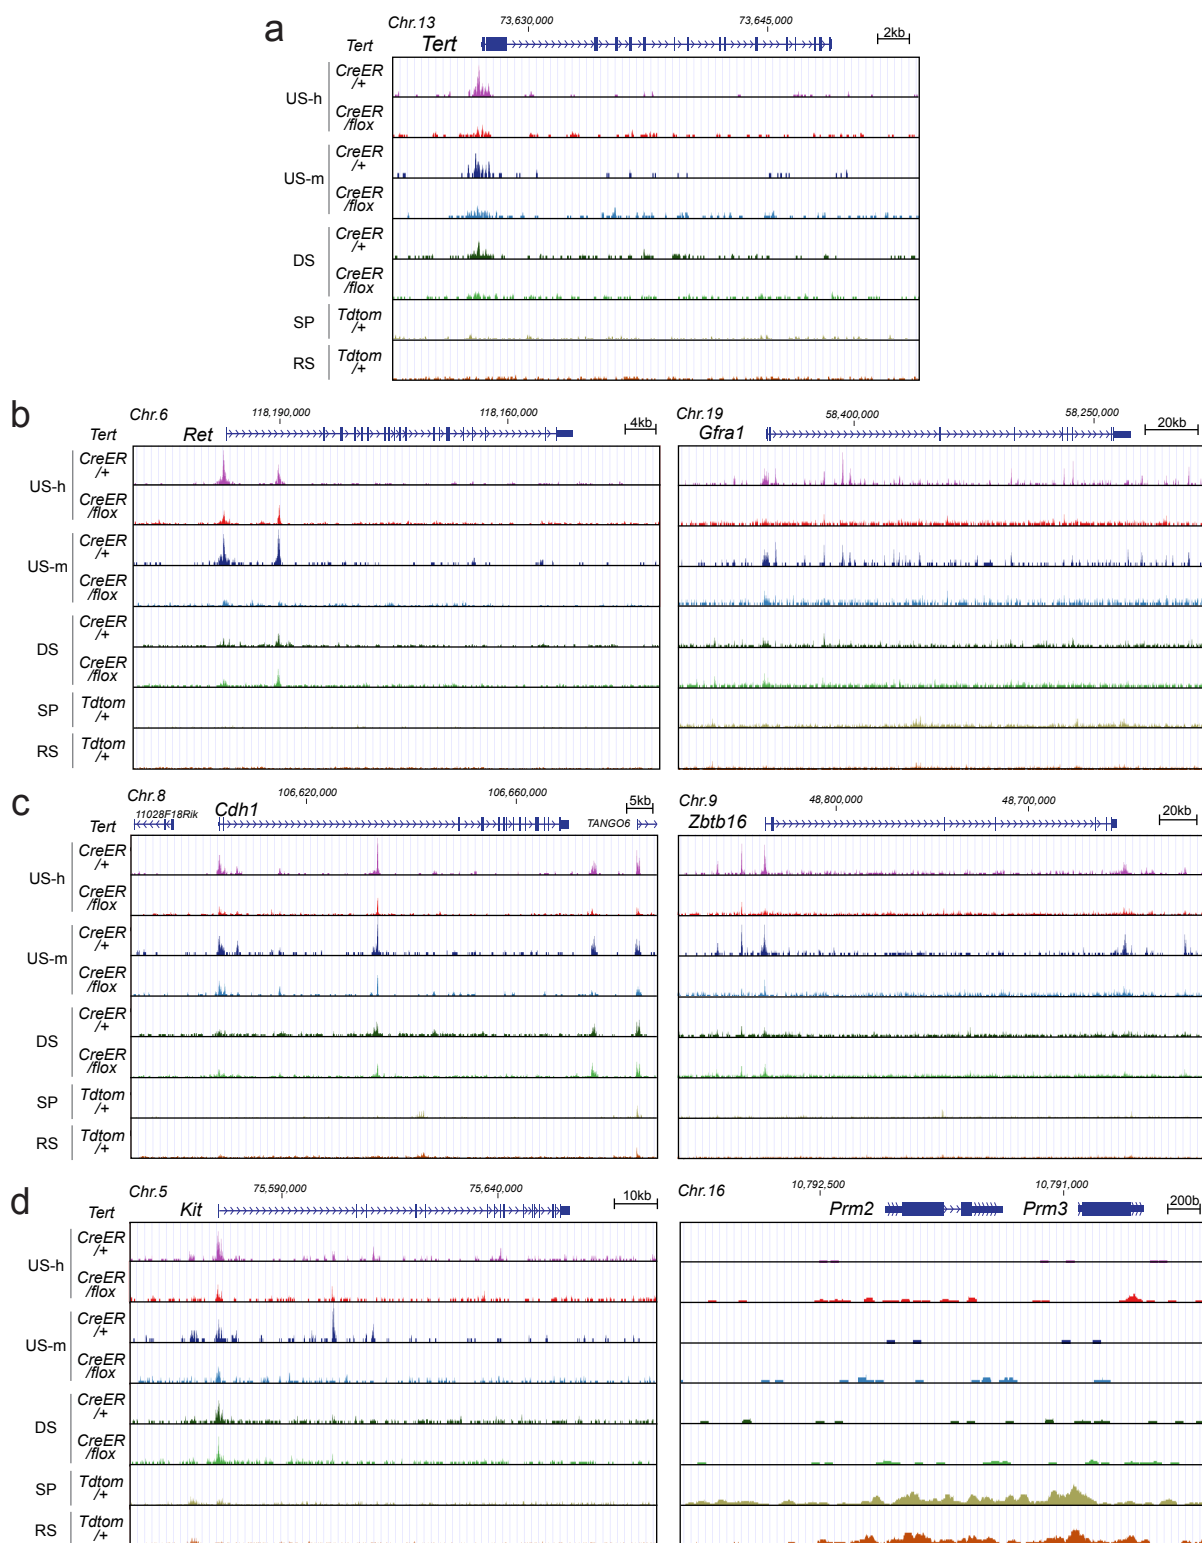



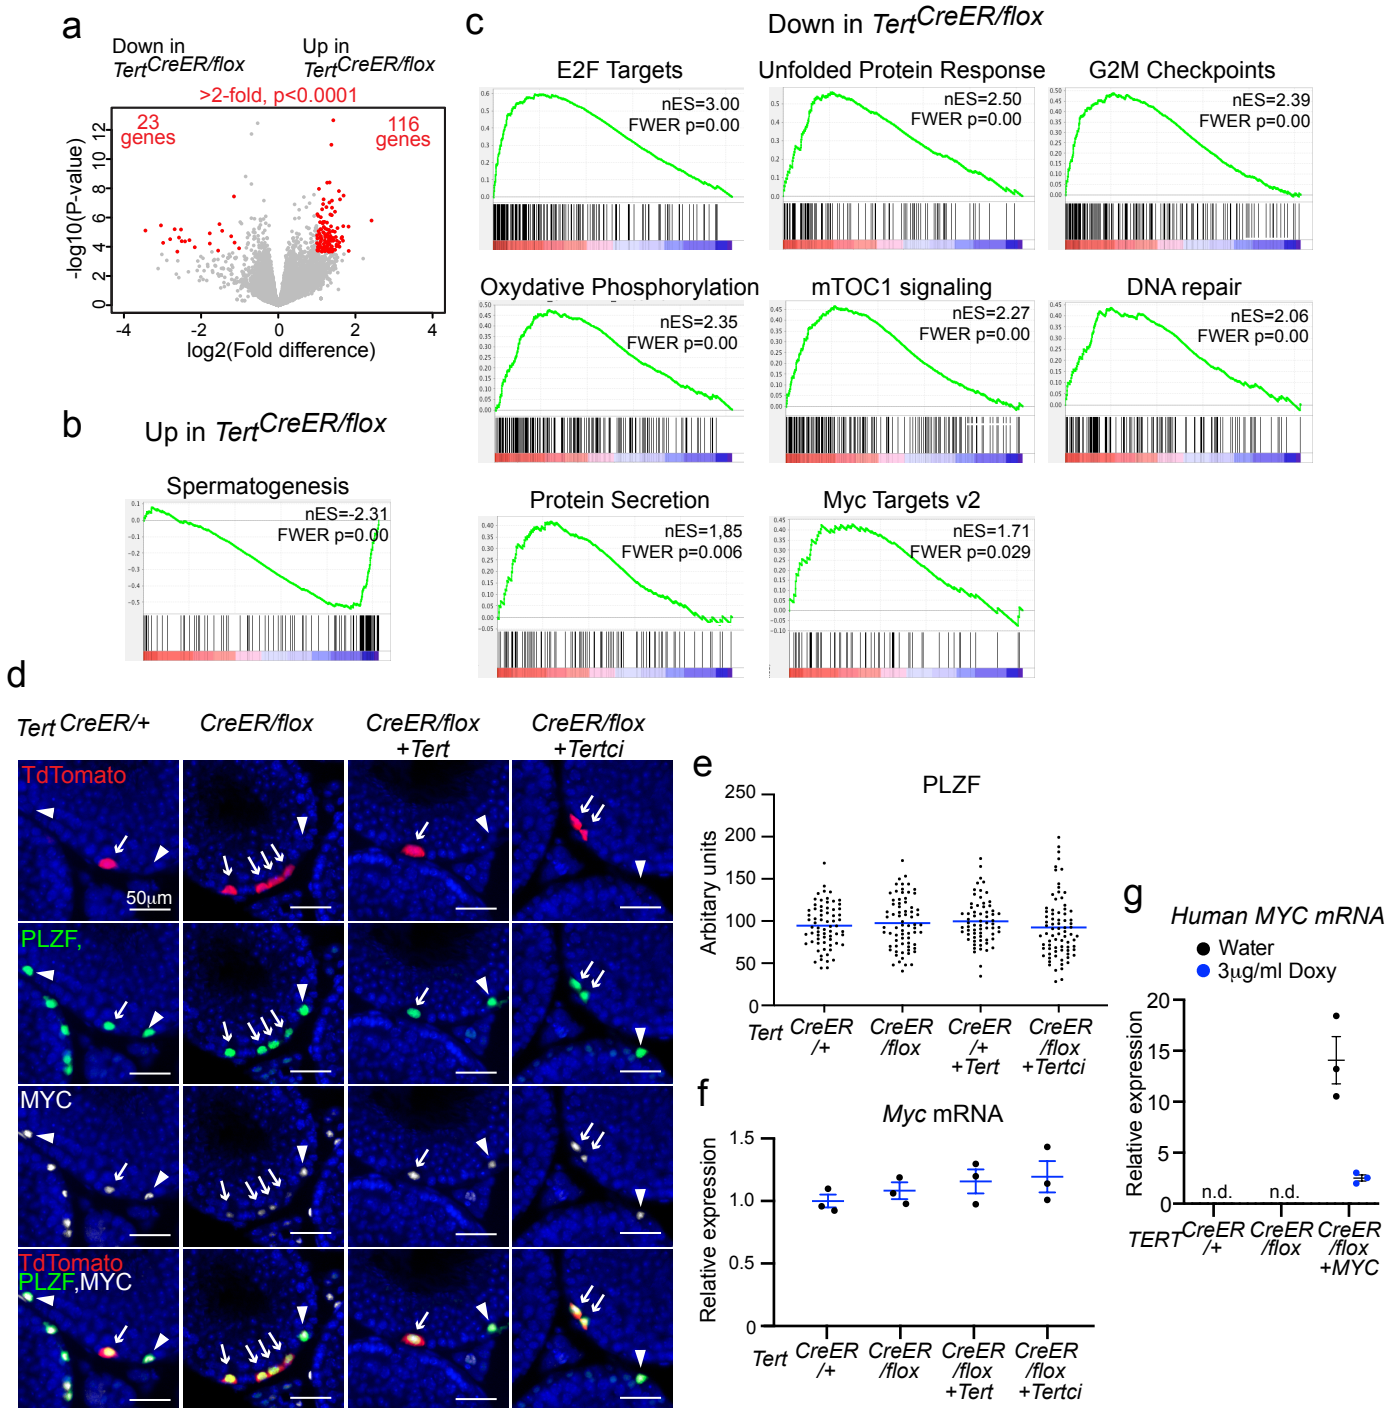

Hasegawa et al. Extended Data Fig.10

**a**

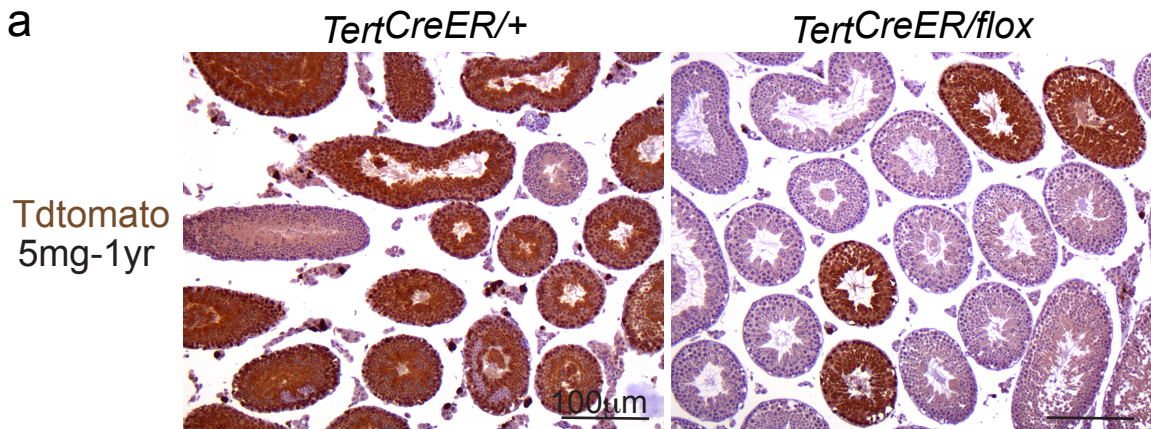

**b**

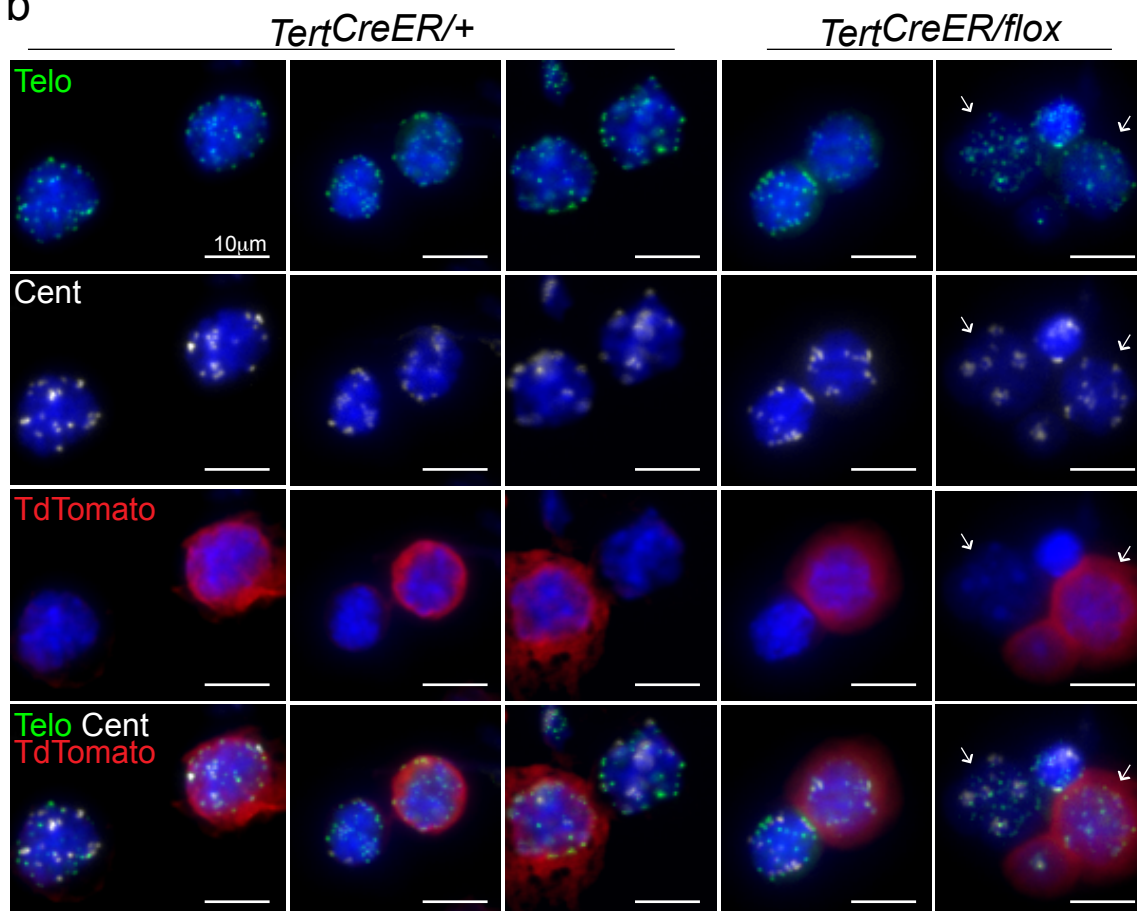

Supplement: Supplementary file [file media-1.pdf]
